# Supplementary material for: Generation of zero-valent sulfur from dissimilatory sulfate reduction in sulfate-reducing microorganisms
Source: PubMed Central journal article supplement — Proc Natl Acad Sci U S A. 2023 May 8;120(20):e2220725120. doi: 10.1073/pnas.2220725120 (PMC10194018; doi:10.1073/pnas.2220725120), 2023-05-08
Supplement: pnas.2220725120.sapp.pdf [file pnas.2220725120.sapp.pdf]

## Supporting Information for

### **Generation of zero-valent sulfur from dissimilatory sulfate reduction in sulfate-reducing microorganisms**

Shanquan Wang, Qihong Lu, Zhiwei Liang, Xiaoxiao Yu, Mang Lin, Bixian Mai, Rongliang Qiu, Wensheng Shu, Zhili He, Judy D. Wall

Shanquan Wang  
Email: wangshanquan@mail.sysu.edu.cn

#### **This PDF file includes:**

Figures S1 to S8  
Tables S1 to S6  
SI References

**A**

| Sulfate reducing bacteria                      | Abbr. | Collection no. | Origin                            | Gram-positive/negative | Temp.        | Electron donor | Electron acceptor | Medium     |
|------------------------------------------------|-------|----------------|-----------------------------------|------------------------|--------------|----------------|-------------------|------------|
| <i>Desulfovibrio vulgaris</i> Hildenborough    | DvH   | DSM 644        | Wealden clay                      | Gram-negative          | Mesophilic   | DL-Lactate     | Sulfate           | LS4D       |
| <i>Desulfoformulus ruminis</i> DL              | DLT   | DSM 2154       | Rumen of hay-fed sheep            | Gram-positive*         | Mesophilic   | DL-Lactate     | Sulfate           | LS4D       |
| <i>Desulfomicrobium baculatum</i> X            | DMB   | DSM 4028       | Manganese ore                     | Gram-negative          | Mesophilic   | DL-Lactate     | Sulfate           | LS4D       |
| <i>Pseudodesulfovibrio indicus</i> I2          | PDI   | DSM 101483     | Deep-sea serpentinized peridotite | Gram-negative          | Mesophilic   | DL-Lactate     | Sulfate           | LS4D       |
| <i>Thermodesulfatator autotrophicus</i> S606   | TDA   | DSM 101864     | Deep-sea chimney wall             | Gram-negative          | Thermophilic | Hydrogen       | Sulfate           | SO4PNsalts |
| <i>Halodesulfovibrio marinesediminis</i> C/L 2 | HDM   | DSM 17456      | Coastal sediment                  | Gram-negative          | Mesophilic   | DL-Lactate     | Sulfate           | LS4D       |

Note: \* *Desulfoformulus ruminis* DL has Gram-positive-type cell wall structure

**B**

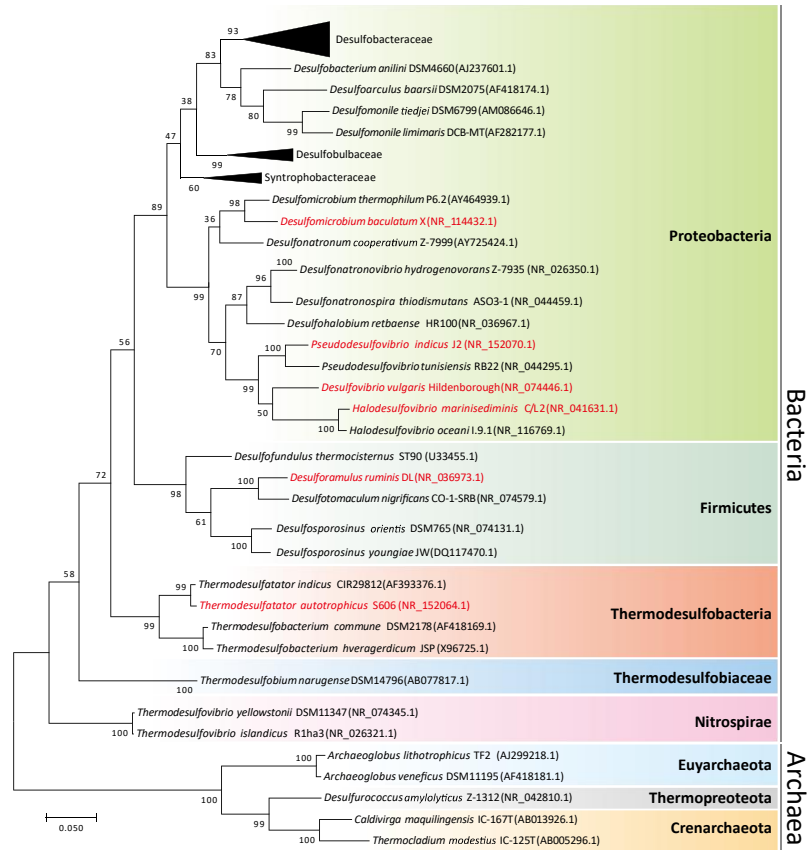

**Fig. S1. Phylogenetic and physiological information on the isolated sulfate reducing microorganisms (SRMs) selected in this study. A,** Basic phylogenetic and physiological information on the selected SRMs; **B,** Phylogenetic tree based on the full-length 16S rRNA gene sequences of representative SRMs. The SRMs selected in this study are in red font. The sequences were obtained from the NCBI database and the tree was created using MEGA 7 software. The bootstrap values at nodes are based on 1,000 replicates. The scale bar represents a 5 bp substitution per 100 nucleotides.

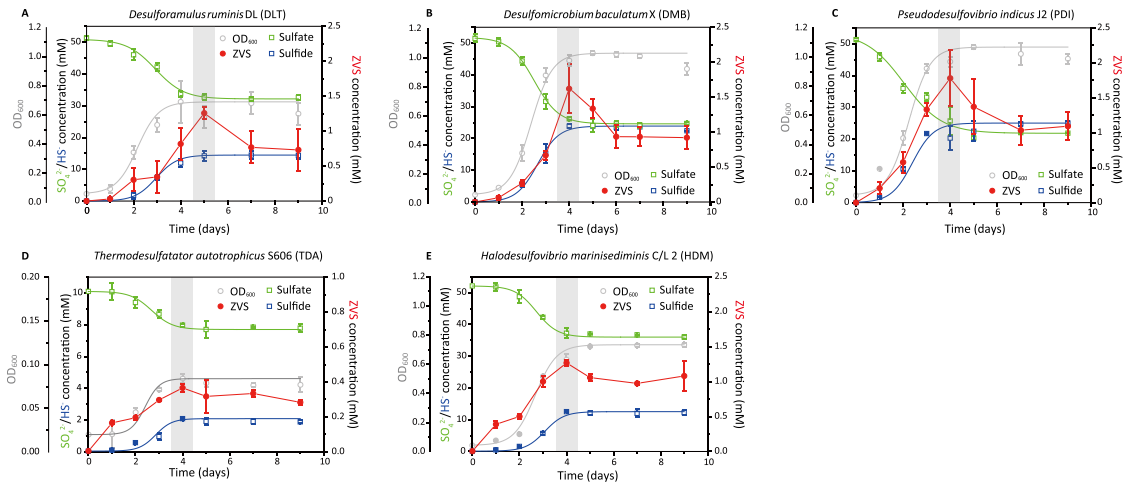

**Fig. S2. Dissimilatory sulfate reduction and ZVS generation in five pure cultures of SRMs.** **A**, *Desulfotomaculum ruminis* DL (DLT); **B**, *Desulfomicrobium baculatum* X (DMB); **C**, *Pseudodesulf vibrio indicus* J2 (PDI); **D**, *Thermodesulfatator autotrophicus* S606 (TDA); **E**, *Halodesulf vibrio marinisediminis* C/L 2 (HDM). The peak time for accumulation of the highest concentrations of total ZVS (ZVS peak time) in the five SRM cultures were shaded in grey. Error bars represent standard deviations of triplicate cultures.

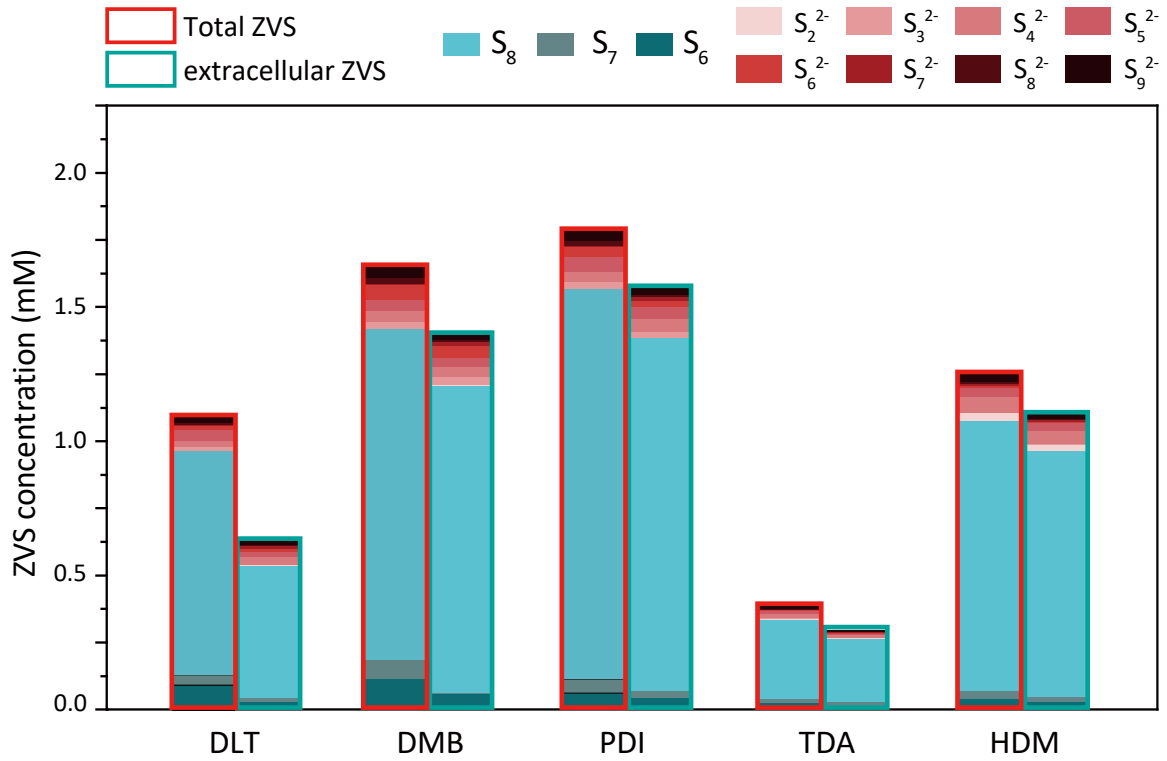

**Fig. S3.** The total/extracellular ZVS generation of five SRM pure cultures under their optimum growth conditions.

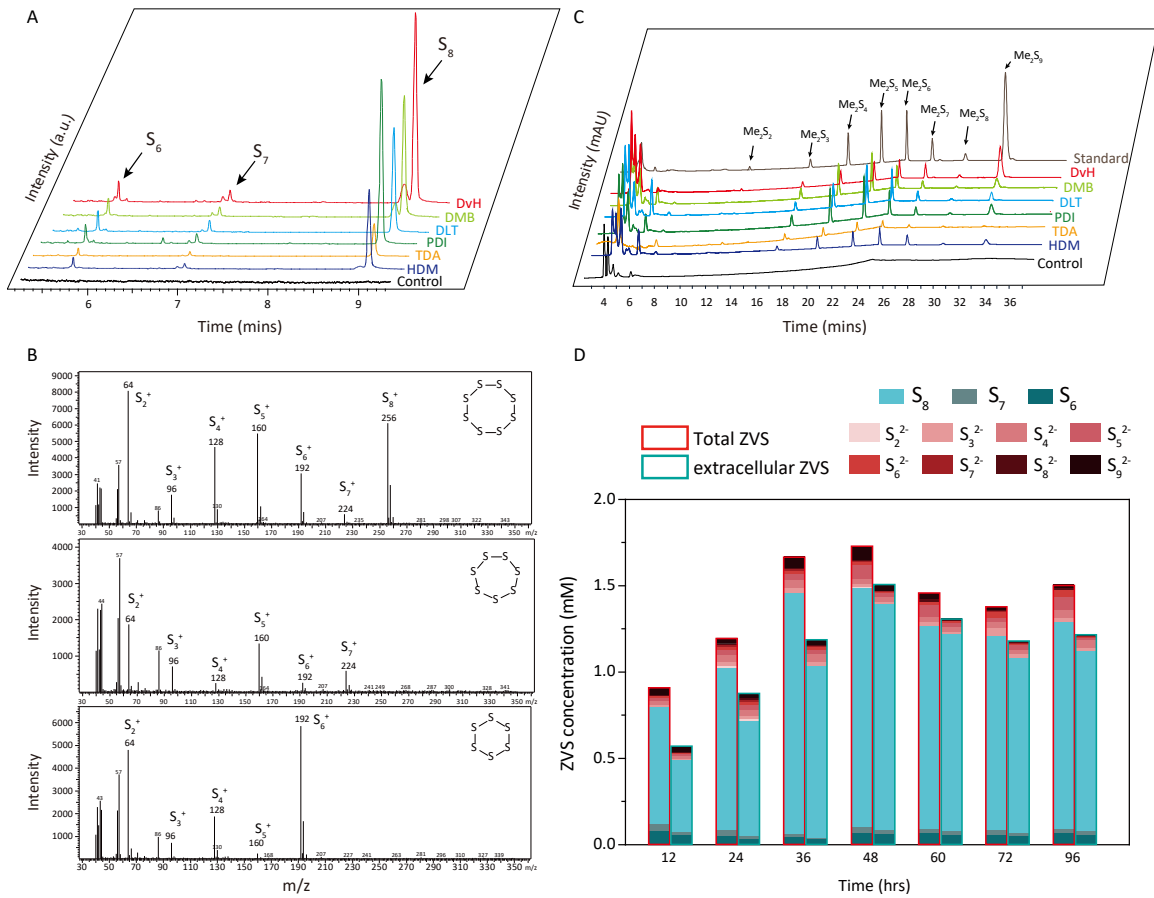

**Fig. S4. Identification and characterization of DSR-derived ZVS composition.** **A**, GC-MS chromatogram and **B**, mass spectrum of major elemental sulfur species in the six SRM pure cultures. **C**, HPLC chromatogram of polysulfide species in the six SRM pure cultures. **D**, Temporal change in compositional profiles of total/extracellular ZVS in DvH.

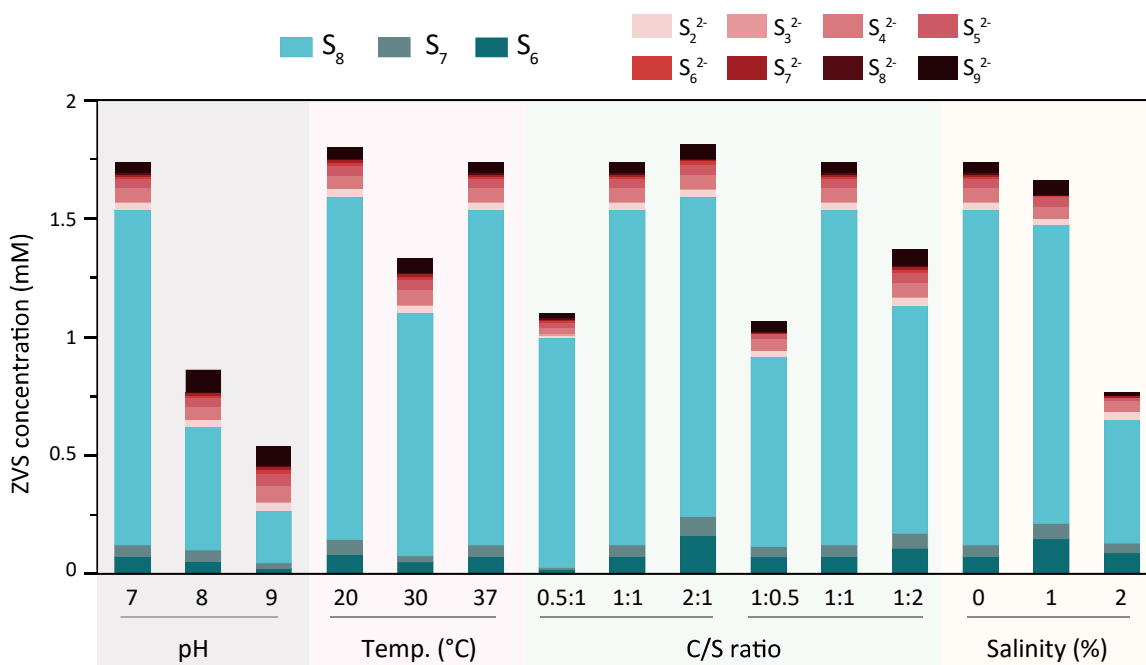

**Fig. S5. Compositional profiles of ZVS in DvH cultures under different growth conditions, including different pH (7, 8, and 9), temperature (20, 30, and 37°C), lactate(C) to sulfate(S) ratio (0.5:1, 1:1, 2:1, 1:0.5, 1:1, and 1:2), and Salinity (0, 1, and 2%).**

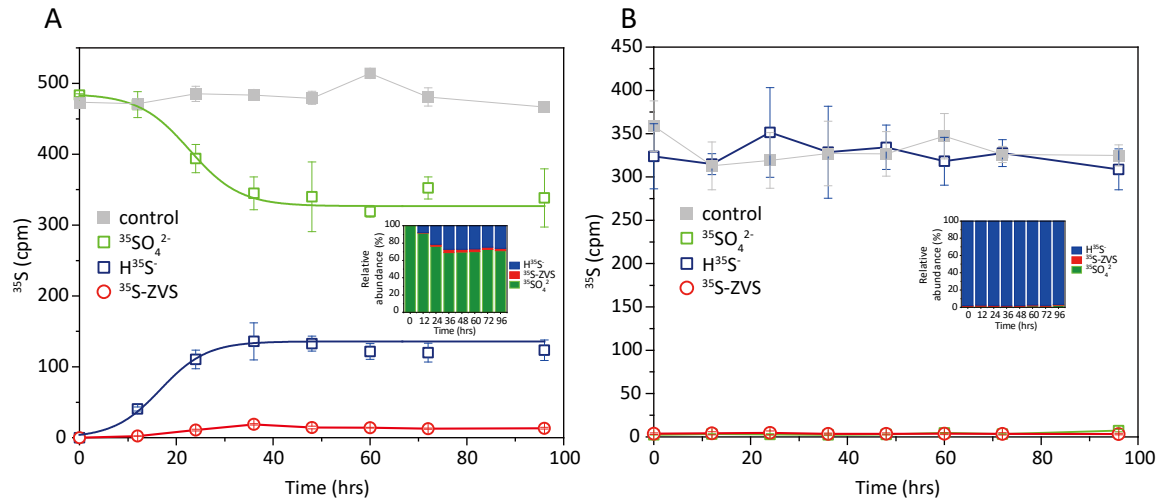

**Fig. S6. Temporal changes in  $^{35}\text{S}$ -activities of different sulfur species and their relative abundance in DvH cultures fed with  $^{35}\text{S}$ -sulfate (A) and  $^{35}\text{S}$ -sulfide (B).**

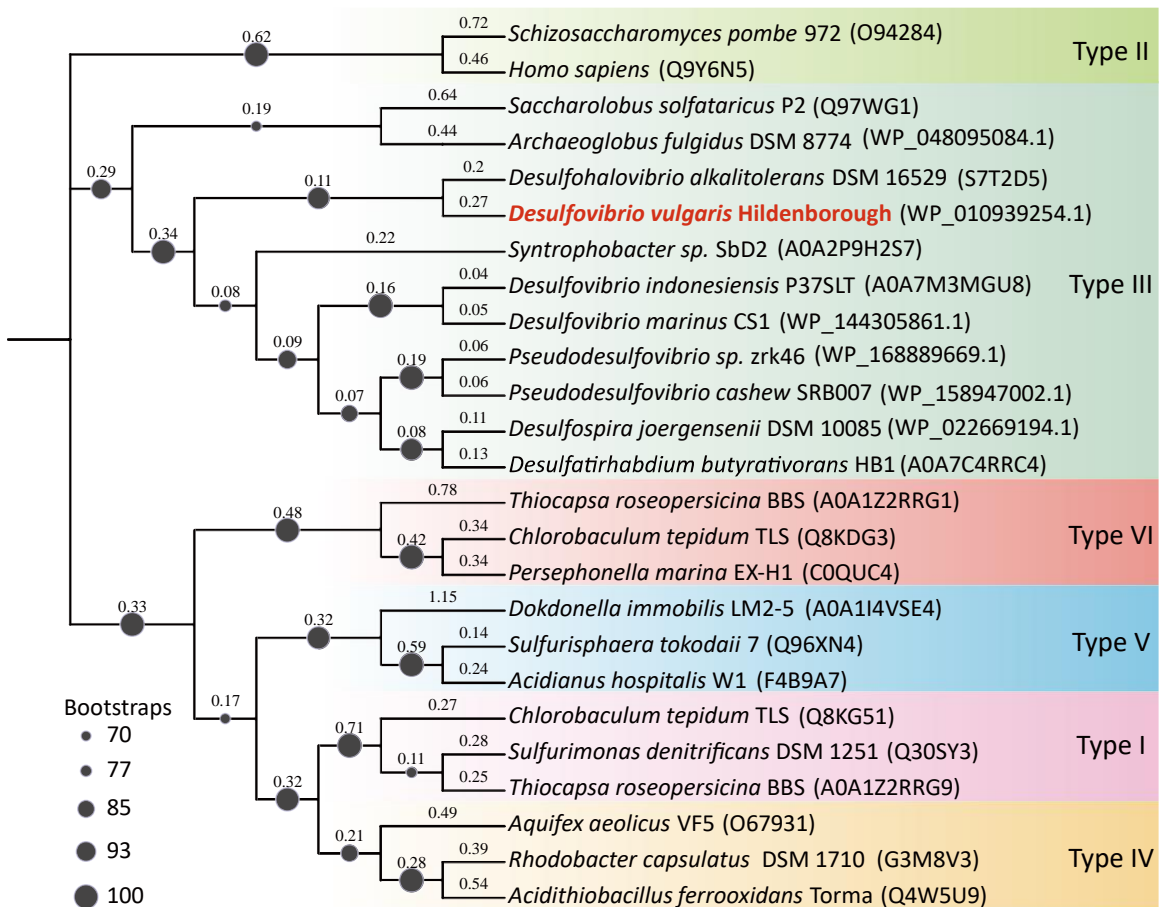

**Fig. S7. Phylogeny of *sqr* homologue gene sequences from both SRMs and sulfur-oxidizing bacteria (SOB).** Deduced amino acid sequences of the *sqr* homologue genes are analyzed here, and the phylogenetic tree is inferred and reconstructed under the maximum likelihood criterion using MEGA 7. Bootstrap values (%) >70 are indicated at the base of each node (black nots with different sizes). The numbers along branch represent the tree scale of each branch.



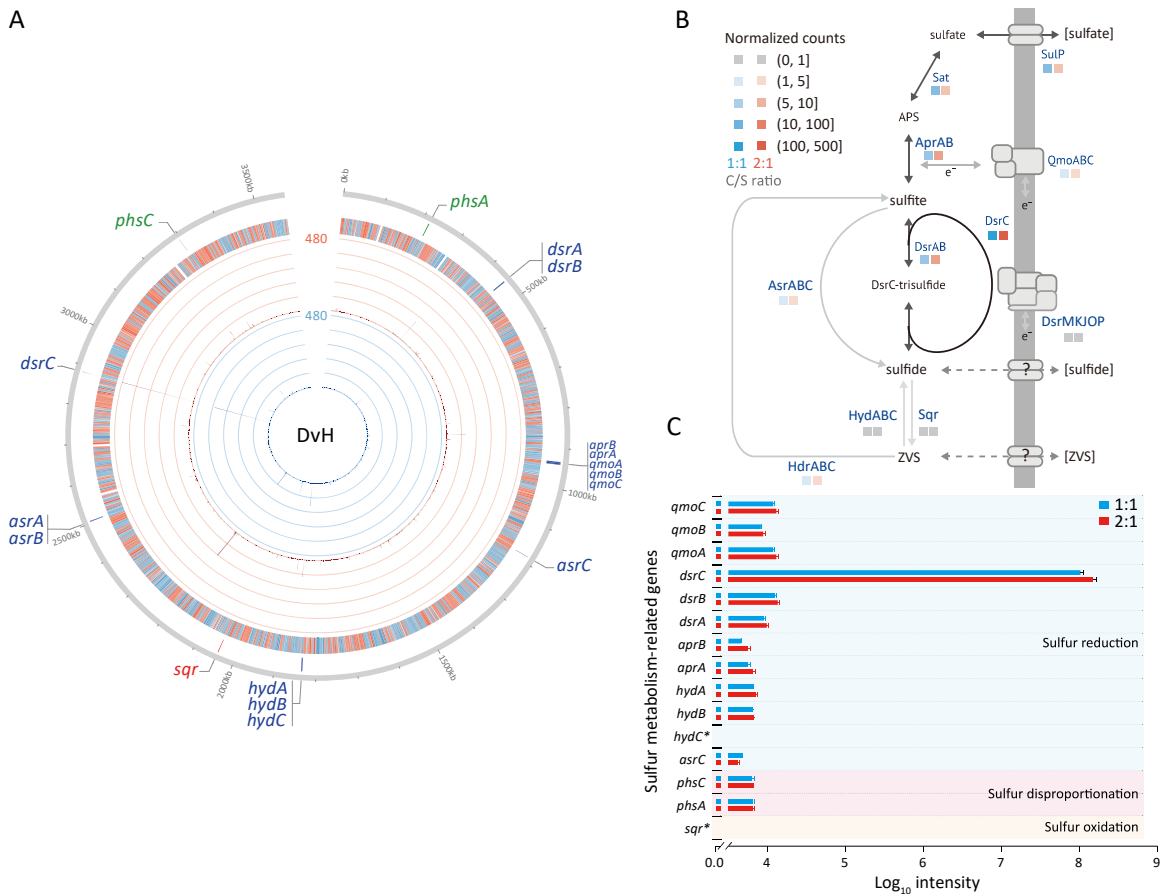

**Fig. S8. Transcriptional analyses of DvH under different growth conditions.** **A**, Circos plot showing the transcription levels of all genes for DvH cultures fed with two different molar ratios of lactate to sulfate, i.e., C/S ratios of 1:1 and 2:1. Tracks from inside to outside: track 1 in blue, DvH with the C/S ratio of 1:1; track 2 in red, DvH with the C/S ratio of 2:1; track 3, predicted ORFs in DvH genome (colors: red, forward strand; blue, reverse strand); track 4, predicted sulfur metabolism-related genes (colors: blue, dissimilatory sulfate reduction-related genes; red, sulfur oxidation-related genes; green, sulfur disproportionation-related genes). **B**, Transcription levels of genes encoding the sulfur metabolism-related enzymes in DvH cultures under the two growth conditions. Normalized counts were calculated on the basis of mean change in cycle threshold ( $\Delta$ Ct) compared to the *recA*. **C**, Translation of key sulfur metabolism-related genes in DvH cultures under the two growth conditions. Protein relative abundances were normalized using *RecA* as the reference. Enzymes (i.e., Sqr and HydC) with translation levels under the detection limit were marked with asterisks (\*). Sat, sulfate adenylyltransferase; Apr, adenosine-5'-phosphosulfate reductase; Dsr, dissimilatory sulfite reductase; DsrMKJOP, transmembrane complex; Asr, anaerobic sulfite reductase; Sqr, sulfide-quinone reductase; Qmo, quinone-interacting membrane bound oxidoreductase; Hdr, heterodisulfide reductase; Hyd, heterotrimeric electron-bifurcating hydrogenase; SulP, Sulfate permease.

**Table S1. Information on genes with a higher transcription level in DvH cultures with the C/S ratio of 2:1 relative to them of DvH cultures with the C/S ratio of 1:1.**

| Locus_tag   | Start <sup>a</sup> | End     | Strand | Length | Annotation                                             | KO assigned | Normalized counts (NC) |        |               | P-value |
|-------------|--------------------|---------|--------|--------|--------------------------------------------------------|-------------|------------------------|--------|---------------|---------|
|             |                    |         |        |        |                                                        |             | 1:1                    | 2:1    | 2:1/1:1 ratio |         |
| DVU_RS06585 | 1466090            | 1466626 | -      | 537    | Bacterioferritin                                       | K03594      | 4.79                   | 19.43  | 4.05          | 0.001   |
| DVU_RS03670 | 864023             | 864259  | +      | 237    | Hypothetical protein                                   | None        | 27.94                  | 102.41 | 3.67          | 0.006   |
| DVU_RS00100 | 27468              | 27635   | +      | 168    | Transcriptional regulator                              | None        | 9.87                   | 29.60  | 3.00          | 0.057   |
| DVU_RS03665 | 863403             | 863747  | -      | 345    | Hypothetical protein                                   | None        | 7.89                   | 21.42  | 2.71          | 0.026   |
| DVU_RS13930 | 3071634            | 3071930 | +      | 297    | Hypothetical protein                                   | None        | 21.76                  | 48.32  | 2.22          | 0.011   |
| DVU_RS06695 | 1495384            | 1496415 | -      | 1032   | OmpA family protein                                    | K03286      | 8.57                   | 18.80  | 2.20          | 0.011   |
| DVU_RS14475 | 3222373            | 3222768 | +      | 396    | MucR family transcriptional regulator                  | None        | 12.68                  | 26.46  | 2.09          | 0.000   |
| DVU_RS14535 | 3236521            | 3236745 | -      | 225    | Rubredoxin                                             | None        | 8.77                   | 17.90  | 2.04          | 0.001   |
| DVU_RS09905 | 2189295            | 2189708 | -      | 414    | Universal stress protein                               | None        | 12.87                  | 24.94  | 1.94          | 0.025   |
| DVU_RS06940 | 1554879            | 1555124 | -      | 246    | Hypothetical protein                                   | None        | 11.34                  | 21.22  | 1.87          | 0.041   |
| DVU_RS01985 | 455770             | 456411  | +      | 642    | Septal ring lytic transglycosylase RlpA family protein | K03642      | 11.81                  | 20.48  | 1.73          | 0.000   |
| DVU_RS10905 | 2422628            | 2422822 | +      | 195    | Heavy-metal-associated domain-containing protein       | K07213      | 56.10                  | 96.94  | 1.73          | 0.031   |
| DVU_RS14490 | 3226519            | 3226902 | -      | 384    | MucR family transcriptional regulator                  | None        | 17.84                  | 29.33  | 1.64          | 0.001   |
| DVU_RS11375 | 2532470            | 2532925 | -      | 456    | Glycine zipper 2TM domain-containing protein           | K06077      | 22.30                  | 36.03  | 1.62          | 0.000   |
| DVU_RS09920 | 2197893            | 2198753 | -      | 861    | 4Fe-4S binding protein                                 | None        | 109.95                 | 174.79 | 1.59          | 0.018   |
| DVU_RS08105 | 1781209            | 1781433 | -      | 225    | DUF2188 domain-containing protein                      | None        | 15.07                  | 22.90  | 1.52          | 0.000   |
| DVU_RS04350 | 1010561            | 1010887 | -      | 327    | ATP synthase F0 subunit C                              | K02110      | 20.57                  | 31.18  | 1.52          | 0.028   |
| DVU_RS03450 | 813205             | 813657  | +      | 453    | Hypothetical protein                                   | None        | 15.56                  | 23.21  | 1.49          | 0.016   |
| DVU_RS12420 | 2765700            | 2766248 | -      | 549    | Hypothetical protein                                   | None        | 29.77                  | 43.56  | 1.46          | 0.002   |
| DVU_RS03785 | 884382             | 885779  | -      | 1398   | Outer membrane homotrimeric porin                      | None        | 16.24                  | 23.31  | 1.44          | 0.008   |
| DVU_RS01515 | 350418             | 350609  | -      | 192    | Ferredoxin                                             | K05337      | 95.07                  | 136.25 | 1.43          | 0.022   |
| DVU_RS14905 | 3327925            | 3328311 | +      | 387    | Cytochrome c3 family protein                           | None        | 34.89                  | 49.94  | 1.43          | 0.001   |
| DVU_RS08625 | 1881750            | 1882058 | -      | 309    | C-type cytochrome                                      | K08738      | 48.85                  | 64.10  | 1.31          | 0.040   |

**Table S1. Information on genes with a higher transcription level in DvH cultures with the C/S ratio of 2:1 relative to them of DvH cultures with the C/S ratio of 1:1. (Continued)**

| Locus_tag   | Start <sup>a</sup> | End         | Strand | Length | Annotation                                 | KO assigned | Normalized counts (NC) |        |               | P-value |
|-------------|--------------------|-------------|--------|--------|--------------------------------------------|-------------|------------------------|--------|---------------|---------|
|             |                    |             |        |        |                                            |             | 1:1                    | 2:1    | 2:1/1:1 ratio |         |
| DVU_RS09040 | 1980<br>943        | 1981<br>416 | -      | 474    | Purine-binding chemotaxis protein CheW     | K03408      | 18.39                  | 23.82  | 1.30          | 0.00    |
| DVU_RS13015 | 2883<br>462        | 2883<br>776 | +      | 315    | TusE/DsrC/DsvC family sulfur relay protein | K23077      | 369.83                 | 472.75 | 1.28          | 0.058   |
| DVU_RS10470 | 2314<br>522        | 2314<br>788 | +      | 267    | Hypothetical protein                       | None        | 16.39                  | 20.18  | 1.23          | 0.068   |
| DVU_RS01970 | 4524<br>27         | 4526<br>60  | +      | 234    | Protein DsvD                               | None        | 69.03                  | 83.60  | 1.21          | 0.037   |
| DVU_RS15420 | 3452<br>150        | 3452<br>335 | -      | 186    | Ferredoxin family protein                  | None        | 270.33                 | 319.14 | 1.18          | 0.061   |
| DVU_RS13295 | 2943<br>651        | 2944<br>172 | +      | 522    | Hypothetical protein                       | None        | 17.65                  | 20.30  | 1.15          | 0.140   |
| DVU_RS02440 | 5774<br>21         | 5776<br>81  | -      | 261    | 30S ribosomal protein S15                  | K02956      | 21.71                  | 24.70  | 1.14          | 0.215   |
| DVU_RS03965 | 9268<br>07         | 9270<br>37  | -      | 231    | KH domain-containing protein               | K06960      | 23.36                  | 26.06  | 1.12          | 0.020   |
| DVU_RS03950 | 9245<br>60         | 9249<br>04  | -      | 345    | 50S ribosomal protein L19                  | K02884      | 17.99                  | 20.02  | 1.11          | 0.196   |
| DVU_RS03970 | 9271<br>24         | 9273<br>60  | -      | 237    | 30S ribosomal protein S16                  | K02959      | 26.86                  | 29.68  | 1.11          | 0.060   |
| DVU_RS16690 | 1016<br>065        | 1016<br>208 | +      | 144    | Hypothetical protein                       | None        | 30.09                  | 32.74  | 1.09          | 0.094   |
| DVU_RS07410 | 1650<br>124        | 1650<br>630 | +      | 507    | Ferritin                                   | K02217      | 21.33                  | 22.48  | 1.05          | 0.091   |
| DVU_RS14585 | 3244<br>295        | 3244<br>795 | +      | 501    | Peptidoglycan-associated lipoprotein Pal   | K03640      | 60.38                  | 61.54  | 1.02          | 0.333   |

Note: a, start and end position of each gene was based on the genome information of *Desulfovibrio vulgaris* Hildenborough (accession: NC\_002937.3)

**Table S2. Isolated and characterized strains of ZVS-metabolizing microorganisms including ZVS-reducing-microorganisms (S<sup>0</sup>RM) and ZVS-disproportionating-microorganisms (S<sup>0</sup>DM).**

| Species of S <sup>0</sup> RM             | Phylum                | Source               | Electron donor & Carbon source             | References |
|------------------------------------------|-----------------------|----------------------|--------------------------------------------|------------|
| <i>Desulfuromonas acetoxidans</i>        | Proteobacteria        | Sea water            | Acetate, ethanol, propanol                 | 1          |
| <i>Desulfuromonas acetexigens</i>        | Proteobacteria        | Freshwater sediment  | Acetate                                    | 2          |
| <i>Hippea maritima</i>                   | Proteobacteria        | Marine hot vent      | Acetate, H <sub>2</sub>                    | 3          |
| <i>Geobacter sulfurreducens</i>          | Proteobacteria        | Freshwater sediment  | Acetate                                    | 4          |
| <i>Pelobacter carbinolicus</i>           | Proteobacteria        | Freshwater sediment  | Ethanol, H <sub>2</sub>                    | 5          |
| <i>Desulfurella acetivorans</i>          | Proteobacteria        | Hot spring           | Acetate                                    | 6          |
| <i>Acidianus infernus</i>                | Crenarchaeota         | Marine hot vent      | Glucose, acetate, butyrate, H <sub>2</sub> | 7          |
| <i>Sulfolobus ambivalens</i>             | Crenarchaeota         | Solfataric waterhole | CO <sub>2</sub> , H <sub>2</sub>           | 8          |
| <i>Pyrodictium occultum</i>              | Crenarchaeota         | Hot sea floor        | CO <sub>2</sub> , H <sub>2</sub>           | 9          |
| <i>Pyrobaculum neutrophilum</i>          | Crenarchaeota         | Hot spring           | CO <sub>2</sub> , H <sub>2</sub>           | 9          |
| <i>Pyrobaculum maritimus</i>             | Crenarchaeota         | Hot sea water        | CO <sub>2</sub> , H <sub>2</sub>           | 9          |
| <i>Stygiolobus azoricus</i>              | Crenarchaeota         | Solfataric field     | CO <sub>2</sub> , H <sub>2</sub>           | 10         |
| Species of S <sup>0</sup> DM             | Phylum                | Source               | Carbon source                              | References |
| <i>Dissulfurimicrobium hydrothermale</i> | Proteobacteria        | Hydrothermal pond    | Succinate                                  | 11         |
| <i>Dissulfurispira thermophila</i>       | Nitrospirota          | Hot spring           | CO <sub>2</sub>                            | 12         |
| <i>Dissulfurirhabdus thermomarina</i>    | Proteobacteria        | Hydrothermal vents   | CO <sub>2</sub>                            | 13         |
| <i>Dissulfuribacter thermophilus</i>     | Proteobacteria        | Hydrothermal vents   | CO <sub>2</sub>                            | 14         |
| <i>Caldimicrobium thiodismutans</i>      | Thermodesulfobacteria | Hot spring           | CO <sub>2</sub>                            | 15         |
| <i>Desulfocapsa sulfoexigens</i>         | Proteobacteria        | Marine sediment      | Acetate                                    | 16         |
| <i>Desulfurella amilsii</i>              | Proteobacteria        | River sediment       | Acetate                                    | 17         |
| <i>Dethiobacter alkaliphilus</i>         | Firmicutes            | Soda Lake            | Acetate                                    | 18         |
| <i>Pantoea agglomerans</i>               | Proteobacteria        | Marine sediment      | Acetate                                    | 19         |
| <i>Thermosulfurimonas dismutans</i>      | Thermodesulfobacteria | Hydrothermal vents   | CO <sub>2</sub>                            | 20         |
| <i>Thermosulfuriphilus ammonigenes</i>   | Thermodesulfobacteria | Hydrothermal vents   | CO <sub>2</sub>                            | 21         |

**Table S3. Gibbs free energy of reactions involving the dissimilatory reduction of sulfate and ZVS.**

| Equations                                                                               | $\Delta G^\circ$ , kJ/mol of |          |
|-----------------------------------------------------------------------------------------|------------------------------|----------|
|                                                                                         | Reaction                     | Electron |
| $SO_4^{2-} + 2Lactate^- \rightarrow 2Acetate^- + HS^- + 2HCO_3^- + H^+$                 | -160.67                      | -20.08   |
| $SO_4^{2-} + 2/3Lactate^- \rightarrow HS^- + 2HCO_3^- + 1/3H^+$                         | -85.2                        | -10.65   |
| $SO_4^{2-} + 3/2Lactate^- + 1/2H^+ \rightarrow 3/2Acetate^- + S_0 + 3/2HCO_3^- + H_2O$  | -130.725                     | -21.78   |
| $SO_4^{2-} + 1/2Lactate^- + H^+ \rightarrow S_0 + 3/2HCO_3^- + H_2O$                    | -74.13                       | -12.36   |
| $Acetate^- + 4S_0 + 4H_2O \rightarrow 4HS^- + 2HCO_3^- + 5H^+$                          | -3.29                        | -6.58    |
| $SO_4^{2-} + 2Lactate^- + 2H^+ \rightarrow 2Acetate^- + H_2S(g) + 2CO_2(g) + 2H_2O$     | -175.95                      | -21.99   |
| $SO_4^{2-} + 2/3Lactate^- + 8/3H^+ \rightarrow H_2S(g) + 2CO_2(g) + 2H_2O$              | -100.4                       | -12.55   |
| $SO_4^{2-} + 3/2Lactate^- + 2H^+ \rightarrow 3/2Acetate^- + S_0 + 2/3CO_2(g) + 5/2H_2O$ | -130.93                      | -21.82   |
| $SO_4^{2-} + 1/2Lactate^- + 5/2H^+ \rightarrow S_0 + 2/3CO_2(g) + 5/2H_2O$              | -74.33                       | -12.39   |
| $Acetate^- + 4S_0 + H^+ + 2H_2O \rightarrow 4H_2S(g) + 2CO_2(g)$                        | -39.08                       | -19.54   |

**Table S4. 16S rRNA gene amplicon sequencing-based metadata of global marine/terrestrial sites with presence of S<sup>0</sup>MMs (i.e., S<sup>0</sup>RM and S<sup>0</sup>DM) and SRMs.**

| No | Type | Location                  | Coordinates      | S <sup>0</sup> RB                         |                       | S <sup>0</sup> DB                     |          | SRB                                                                          |          | Accession   | Ref. |
|----|------|---------------------------|------------------|-------------------------------------------|-----------------------|---------------------------------------|----------|------------------------------------------------------------------------------|----------|-------------|------|
|    |      |                           |                  | Taxonomy                                  | R.A. (%) <sup>b</sup> | Taxonomy                              | R.A. (%) | Taxonomy                                                                     | R.A. (%) |             |      |
| 1  | Soil | Antarctica                | 62.16S, 58.96W   | <i>Geobacter</i>                          | 6.16E-03              | N.A.                                  | N.A.     | <i>Desulforhopalus</i><br><i>Desulfobacterium</i>                            | 5.70E-01 | SRR16996395 | 22   |
| 2  | Soil | Antarctica                | 74.76S, 164.01E  | <i>Desulfuromonas</i>                     | 2.75E-03              | N.A.                                  | N.A.     | <i>Desulforhopalus</i><br><i>Desulfobacterium</i><br><i>Desulfobulbus</i>    | 1.57E+00 | SRR16996404 | 22   |
| 3  | Soil | Antarctica                | 62.18S, 58.97W   | <i>Geobacter</i><br><i>Desulfuromonas</i> | 9.95E-03              | N.A.                                  | N.A.     | <i>Desulforhopalus</i><br><i>Desulfobacterium</i><br><i>Desulfobacterium</i> | 5.27E-01 | SRR16996409 | 22   |
| 4  | Soil | Antarctica                | 72.31S, 170.26E  | <i>Desulfuromonas</i>                     | 2.33E-02              | <i>Pantoea</i>                        | 4.89E-03 | <i>Desulforhopalus</i><br><i>Desulfobacterium</i><br><i>Desulfobacterium</i> | 8.43E+00 | SRR16996416 | 22   |
| 5  | Soil | Antarctica                | 77.21S, 166.44E  | <i>Geobacter</i><br><i>Desulfuromonas</i> | 7.06E-04              | N.A.                                  | N.A.     | <i>Desulforhopalus</i><br><i>Desulfobacterium</i><br><i>Desulfobacterium</i> | 2.08E-02 | SRR16996428 | 22   |
| 6  | Soil | Antarctica                | 64.89S, 62.87W   | <i>Geobacter</i>                          | 2.03E-02              | N.A.                                  | N.A.     | <i>Desulfosarcina</i><br><i>Desulfosporosinus</i>                            | 1.56E-02 | SRR17050022 | 22   |
| 7  | Soil | Antarctica                | 68.49S, 78.10E   | <i>Geobacter</i><br><i>Desulfuromonas</i> | 1.05E-02              | N.A.                                  | N.A.     | <i>Desulfosporosinus</i>                                                     | 3.28E-02 | SRR16979831 | 22   |
| 8  | Soil | Petersham, U.S.           | 42.5 N, 72.19 W  | <i>Geobacter</i>                          | 2.84E-03              | N.A.                                  | N.A.     | <i>Desulfosporosinus</i>                                                     | 8.51E-03 | c           | 23   |
| 9  | Soil | Wheelman, U.S.            | 39.99N, 105.37 W | <i>Pelobacter</i><br><i>Geobacter</i>     | 1.13E-02              | <i>Pantoea</i>                        | 7.99E-02 | <i>Desulfosporosinus</i>                                                     | 1.88E-03 | c           | 23   |
| 10 | Soil | Swaziland                 | 46.63N, 10.37E   | <i>Geobacter</i>                          | 1.24E-01              | N.A.                                  | N.A.     | <i>Desulfosporosinus</i><br><i>Desulfobulbus</i>                             | 6.10E-03 | c           | 23   |
| 11 | Soil | Australia                 | 33.47 S, 145.55E | <i>Geobacter</i><br><i>Pelobacter</i>     | 3.47E-01              | N.A.                                  | N.A.     | <i>Desulfobulbus</i><br><i>Desulfosporosinus</i>                             | 1.24E-01 | c           | 23   |
| 12 | Soil | Muztag Ata glacier, China | 38.26N, 75.00E   | <i>Geobacter</i>                          | 4.87E-02              | <i>Pantoea</i>                        | 1.03E-02 | <i>Desulfosporosinus</i>                                                     | 2.80E-02 | SRR8156999  | 24   |
| 13 | Soil | Barrow Peninsula, US      | 71.33N, 156.11W  | <i>Geobacter</i>                          | 8.06E-02              | <i>Desulfocapsa</i><br><i>Pantoea</i> | 6.69E-02 | <i>Desulfatiglans</i><br><i>Desulfosporosinus</i>                            | 5.43E+00 | SRR9680643  | 25   |
| 14 | Soil | Kirs, Russia              | 59.23N, 52.23E   | <i>Geobacter</i><br><i>Desulfuromonas</i> | 1.70E-01              | N.A.                                  | N.A.     | <i>Desulfobulbus</i><br><i>Desulfococcus</i><br><i>Desulfosarcina</i>        | 2.56E+00 | ERR1779761  | 26   |
| 15 | Soil | Al Farafra Desert, Egypt  | 26.24N, 25.35E   | <i>Geobacter</i><br><i>Desulfuromonas</i> | 1.00E-01              | N.A.                                  | N.A.     | <i>Desulfobulbus</i><br><i>Desulfuromonas</i><br><i>Thermodesulfobivrio</i>  | 1.59E+00 | ERR1779766  | 26   |

**Table S4. 16S rRNA gene amplicon sequencing-based metadata of global marine/terrestrial sites with presence of S<sup>0</sup>MMs (i.e., S<sup>0</sup>RM and S<sup>0</sup>DM) and SRMs. (Continued)**

| No | Type            | Location                                 | Coordinates      | S <sup>0</sup> RB                                     |          | S <sup>0</sup> DB                              |          | SRB                                                                                           |          | Accession  | Ref. |
|----|-----------------|------------------------------------------|------------------|-------------------------------------------------------|----------|------------------------------------------------|----------|-----------------------------------------------------------------------------------------------|----------|------------|------|
|    |                 |                                          |                  | Taxonomy                                              | R.A. (%) | Taxonomy                                       | R.A. (%) | Taxonomy                                                                                      | R.A. (%) |            |      |
| 16 | Soil            | Poltava, Ukraine                         | 49.50N, 34.70E   | <i>Geobacter Desulfuro monas</i>                      | 1.44E-01 | N.A.                                           | N.A.     | <i>Desulfobulbus</i><br><i>Thermodesulfobulbus</i>                                            | 3.98E+00 | ERR1779774 | 26   |
| 17 | Soil            | Nalut Province, Libya                    | 30.05N, 10.11E   | <i>Geobacter Desulfuro monas</i>                      | 5.24E-02 | N.A.                                           | N.A.     | <i>Desulfobulbus</i><br><i>Desulfococcus</i>                                                  | 2.97E-01 | ERR1779777 | 26   |
| 18 | Marine sediment | Caspian Sea                              | 39.74 N, 50.48 E | <i>Geobacter</i>                                      | 8.00E-03 | <i>Desulfocapsa</i>                            | 6.62E-04 | <i>Desulfobulbus</i><br><i>Desulfococcus</i><br><i>Desulfomonile</i>                          | 6.61E-01 | SRR1583209 | 27   |
| 19 | Marine sediment | Caspian Sea                              | 39.99 N, 51.50 E | <i>Geobacter Desulfuro monas</i>                      | 4.37E-02 | <i>Desulfocapsa</i>                            | 2.95E-04 | <i>Desulfobulbus</i><br><i>Desulfococcus</i><br><i>Desulfosarcina</i><br><i>Desulfomonile</i> | 6.55E-01 | SRR1583215 | 27   |
| 20 | Marine sediment | Caspian Sea                              | 40.04 N, 51.34 E | <i>Desulfuro monas</i>                                | 5.62E-02 | <i>Desulfocapsa</i>                            | 4.56E-03 | <i>Desulfobulbus</i><br><i>Desulfococcus</i><br><i>Desulfosarcina</i>                         | 4.16E-01 | SRR1583242 | 27   |
| 21 | Marine sediment | Greenland Sea                            | 77.32 N, 15.39 E | <i>Geobacter Desulfuro monas</i>                      | 3.49E-01 | <i>Desulfoporosinus</i><br><i>Desulfocapsa</i> | 2.52E-02 | <i>Desulfobulbus</i><br><i>Desulfococcus</i><br><i>Desulfosarcina</i>                         | 6.76E+00 | SRR7969004 | 28   |
| 22 | Marine sediment | French Guiana                            | 5.54 N, 53.17W   | <i>Geobacter Desulfuro monas</i><br><i>Pelobacter</i> | 1.78E+00 | <i>Desulfocapsa</i>                            | 1.13E-02 | <i>Desulfobulbus</i><br><i>Desulfococcus</i><br><i>Desulfosarcina</i>                         | 3.23E+00 | SRR027243  | 29   |
| 23 | Marine sediment | French Guiana                            | 5.54 N, 52.11W   | <i>Desulfuro monas</i><br><i>Pelobacter</i>           | 1.70E-01 | <i>Desulfocapsa</i>                            | 1.38E-02 | <i>Desulfobulbus</i><br><i>Desulfococcus</i><br><i>Desulfosarcina</i>                         | 3.30E+00 | SRR027245  | 29   |
| 24 | Marine sediment | Kern River, England                      | 51.87 N, 0.93 E  | <i>Geobacter Desulfuro monas</i><br><i>Pelobacter</i> | 1.06E-01 | <i>Desulfocapsa</i>                            | 5.62E-02 | <i>Desulfobulbus</i><br><i>Desulfococcus</i><br><i>Desulfosarcina</i>                         | 3.21E+00 | SRR027362  | 29   |
| 25 | Marine sediment | Schimonnik Island, Netherlands           | 53.49 N, 6.13 E  | <i>Desulfuro monas</i>                                | 1.01E-01 | <i>Desulfocapsa</i>                            | 7.17E-02 | <i>Desulfobulbus</i><br><i>Desulfococcus</i><br><i>Desulfosarcina</i>                         | 4.11E-01 | SRR027371  | 29   |
| 26 | Marine sediment | La Parguera Natural Reserve, Puerto Rico | 17.87 N, 67.04 W | <i>Pelobacter</i>                                     | 5.83E-02 | <i>Desulfocapsa</i>                            | 1.46E-02 | <i>Desulfobulbus</i><br><i>Desulfococcus</i>                                                  | 1.17E-01 | SRR027679  | 29   |
| 27 | Marine sediment | Peninsula Valdes, Argentina              | 42.42 S, 64.11 W | <i>Desulfuro monas</i><br><i>Pelobacter</i>           | 5.75E-02 | <i>Desulfocapsa</i>                            | 1.44E-02 | <i>Desulfobulbus</i><br><i>Desulfococcus</i><br><i>Desulfosarcina</i>                         | 2.97E-01 | SRR027686  | 29   |

**Table S4. 16S rRNA gene amplicon sequencing-based metadata of global marine/terrestrial sites with presence of S<sup>0</sup>MMs (i.e., S<sup>0</sup>RM and S<sup>0</sup>DM) and SRMs. (Continued)**

| No | Type            | Location          | Coordinates       | S <sup>0</sup> RB                         |          | S <sup>0</sup> DB   |          | SRB                                                                         |          | Accession     | Ref. |
|----|-----------------|-------------------|-------------------|-------------------------------------------|----------|---------------------|----------|-----------------------------------------------------------------------------|----------|---------------|------|
|    |                 |                   |                   | Taxonomy                                  | R.A. (%) | Taxonomy            | R.A. (%) | Taxonomy                                                                    | R.A. (%) |               |      |
| 28 | Marine sediment | Talcahuano, Chile | 36.69 S, 73.07 W  | <i>Desulfuromonas</i>                     | 1.27E-02 | <i>Desulfocapsa</i> | 4.13E-02 | <i>Desulfobulbus</i><br><i>Desulfobacter</i>                                | 2.38E+00 | SRR027975     | 29   |
| 29 | Marine sediment | Talcahuano, Chile | 36.64 S, 73.04 W  | <i>Geobacter</i>                          | 2.51E-02 | <i>Desulfocapsa</i> | 2.19E-02 | <i>Desulfobulbus</i><br><i>Desulfococcus</i><br><i>Desulfobacterium</i>     | 1.42E+00 | SRR027976     | 29   |
| 30 | Marine sediment | Arabian sea       | 10.10 N, 59.29 E  | <i>Geobacter</i>                          | 4.76E-02 | <i>Desulfocapsa</i> | 4.04E-03 | <i>Desulfobulbus</i><br><i>Desulfococcus</i>                                | 1.62E-01 | ERR1779755    | 26   |
| 31 | Marine sediment | Arabian sea       | 10.43 N, 57.46 E  | <i>Geobacter</i><br><i>Desulfuromonas</i> | 8.36E-02 | <i>Desulfocapsa</i> | 4.19E-03 | <i>Desulfobulbus</i><br><i>Desulfococcus</i>                                | 2.93E-01 | ERR1779758    | 26   |
| 32 | Marine sediment | Gulf of Aden      | 15.51 N, 44.97 E  | <i>Geobacter</i><br><i>Desulfuromonas</i> | 6.25E-02 | <i>Desulfocapsa</i> | 4.39E-02 | <i>Desulfobulbus</i><br><i>Desulfococcus</i><br><i>Desulfosarcina</i>       | 1.80E+00 | ERR1779761    | 26   |
| 33 | Marine sediment | Atlantic Ocean    | 52.16 S, 14.17 E  | <i>Geobacter</i><br><i>Desulfuromonas</i> | 3.21E-02 | <i>Desulfocapsa</i> | 3.94E-02 | <i>Desulfatignans</i><br><i>Desulforhopalus</i><br><i>Desulfobulbus</i>     | 3.06E-01 | S_PRJE B23821 | 30   |
| 34 | Marine sediment | Bering Sea        | 55.64 N, 179.46 E | <i>Pelobacter</i>                         | 3.30E-01 | <i>Pantoea</i>      | 4.77E-02 | <i>Desulfatignans</i><br><i>Desulfobulbus</i><br><i>Desulfococcus</i>       | 3.88E+00 | SRR1631774    | 31   |
| 35 | Marine sediment | Pacific Ocean     | 4.88 N, 141.75 W  | <i>Geobacter</i>                          | 6.91E-03 | N.A.                | N.A.     | <i>Desulfotrigonis</i>                                                      | 4.87E-03 | SRR12576035   | 32   |
| 36 | Marine sediment | Pacific Ocean     | 13.76 N, 116.45 W | <i>Geobacter</i>                          | 8.38E-03 | N.A.                | N.A.     | <i>Desulfotrigonis</i>                                                      | 8.38E-03 | SRR1257636    | 32   |
| 37 | Marine sediment | Forlandsundet     | 78.59 N, 11.39 E  | <i>Desulfuromonas</i>                     | 1.23E-01 | <i>Desulfocapsa</i> | 4.28E-01 | <i>Desulforhopalus</i><br><i>Desulfobulbus</i><br><i>Desulfococcus</i>      | 9.15E+00 | SRR4237752    | 33   |
| 38 | Marine sediment | Atlantic Ocean    | 33.48 N, 54.16 W  | <i>Desulfuromonas</i>                     | 7.13E-03 | <i>Desulfocapsa</i> | 6.19E-02 | <i>Desulfatignans</i><br><i>Desulfobulbus</i>                               | 1.56E+00 | SRR6396235    | 34   |
| 39 | Marine sediment | Okinawa Trough    | 30.53 N, 128.00 E | <i>Geobacter</i><br><i>Desulfuromonas</i> | 7.25E-02 | <i>Desulfocapsa</i> | 4.86E-03 | <i>Desulfatignans</i><br><i>Desulfobulbus</i><br><i>Thermodesulfobivrio</i> | 3.61E+00 | SRR3416391    | 35   |
| 40 | Marine sediment | Okinawa Trough    | 29.84 N, 127.63 E | <i>Geobacter</i><br><i>Desulfuromonas</i> | 2.23E-02 | <i>Desulfocapsa</i> | 2.52E-03 | <i>Desulfatignans</i><br><i>Desulfobulbus</i>                               | 3.08E+00 | SRR3416505    | 35   |



**Table S4. 16S rRNA gene amplicon sequencing-based metadata of global marine/terrestrial sites with presence of S<sup>0</sup>MMs (i.e., S<sup>0</sup>RM and S<sup>0</sup>DM) and SRMs. (Continued)**

| No | Type                | Location             | Coordinates       | S <sup>0</sup> RB                     |          | S <sup>0</sup> DB                            |          | SRB                                                                  |          | Accession    | Ref. |
|----|---------------------|----------------------|-------------------|---------------------------------------|----------|----------------------------------------------|----------|----------------------------------------------------------------------|----------|--------------|------|
|    |                     |                      |                   | Taxonomy                              | R.A. (%) | Taxonomy                                     | R.A. (%) | Taxonomy                                                             | R.A. (%) |              |      |
| 41 | Marine sediment     | Indian Ocean         | 26.94 S, 67.32 E  | <i>Geobacter</i>                      | 2.19E-03 | <i>Pantoea</i>                               | 1.83E-03 | <i>Desulfovibrio</i><br><i>Desulfobulbus</i>                         | 2.16E+00 | SRR5007323   | 36   |
| 42 | Marine sediment     | Indian Ocean         | 26.76 S, 67.71 E  | <i>Geobacter</i>                      | 1.10E-03 | <i>Pantoea</i>                               | 7.34E-04 | <i>Desulfovibrio</i>                                                 | 3.13E-01 | SRR5007326   | 36   |
| 43 | Marine sediment     | South China Sea      | 16.89 N, 112.35 E | <i>Geobacter</i>                      | 3.50E-02 | <i>Desulfocapsa</i>                          | 4.07E-03 | <i>Desulfovibrio</i><br><i>Desulfococcus</i><br><i>Desulfatiglas</i> | 6.02E-01 | SRR101434571 | 37   |
| 44 | Marine sediment     | South China Sea      | 16.97 N, 112.19 E | <i>Geobacter</i>                      | 2.46E-02 | <i>Pantoea</i>                               | 2.00E-03 | <i>Desulfovibrio</i><br><i>Desulfococcus</i><br><i>Desulfatiglas</i> | 5.79E-01 | SRR101434831 | 37   |
| 45 | Marine sediment     | North Pacific        | 47.45 N, 127.76 W | <i>Desulfuromonas</i>                 | 5.30E-03 | <i>Pantoea</i>                               | 2.01E-03 | <i>Desulfatiglas</i><br><i>Desulfobulbus</i>                         | 1.03E+00 | DRR179137    | 38   |
| 46 | Marine sediment     | Gulf of Mexico       | 28.09 N, 89.02 W  | <i>Desulfuromonas</i>                 | 7.83E-03 | <i>Pantoea</i>                               | 7.57E-03 | <i>Desulfatiglas</i>                                                 | 1.43E+00 | DRR179159    | 38   |
| 47 | Marine sediment     | North Pacific        | 33.22 N, 136.72 E | <i>Desulfuromonas</i>                 | 5.14E-03 | <i>Pantoea</i>                               | 8.53E-03 | <i>Desulfatiglas</i><br><i>Desulfosporosinus</i>                     | 5.09E-01 | DRR179195    | 38   |
| 48 | Marine sediment     | Baltic Sea           | 58.62 N, 18.25 E  | <i>Desulfuromonas</i>                 | 1.61E-02 | <i>Pantoea</i>                               | 1.20E-02 | <i>Desulfatiglas</i><br><i>Desulfococcus</i>                         | 5.48E-01 | DRR179296    | 38   |
| 49 | Marine sediment     | Baltic Sea           | 55.46 N, 15.47 E  | <i>Desulfuromonas</i>                 | 3.44E-03 | <i>Pantoea</i>                               | 9.06E-02 | <i>Desulfatiglas</i>                                                 | 4.78E-01 | DRR179305    | 38   |
| 50 | Marine sediment     | Bay of Bengal        | 14.00 N, 84.82 E  | <i>Desulfuromonas</i>                 | 5.26E-03 | <i>Pantoea</i>                               | 5.26E-03 | <i>Desulfatiglas</i><br><i>Desulfobulbus</i><br><i>Desulfomonile</i> | 1.09E+00 | DRR179324    | 38   |
| 51 | Marine sediment     | North Atlantic ocean | 33.48 N, 54.16 W  | <i>Desulfuromonas</i>                 | 3.07E-03 | N.A.                                         | N.A.     | <i>Desulfatiglas</i><br><i>Desulfobulbus</i>                         | 1.90E-01 | DRR179368    | 38   |
| 52 | Marine sediment     | Pacific Ocean        | 9.11 S, 80.58 W   | <i>Desulfuromonas</i>                 | 6.72E-03 | <i>Desulfocapsa</i>                          | 2.94E-03 | <i>Desulfatiglas</i><br><i>Desulfobulbus</i>                         | 3.77E+00 | DRR181262    | 38   |
| 53 | Hot spring sediment | Tibet, China         | 28.52 N, 91.88 E  | <i>Geobacter</i><br><i>Sulfobolus</i> | 3.06E-02 | <i>Caldimicrobium</i><br><i>Desulfurella</i> | 2.79E-02 | <i>Thermodesulfobivrio</i><br><i>Desulfosporosinus</i>               | 1.19E+00 | SRR5313425   | 39   |
| 54 | Hot spring sediment | Tibet, China         | 29.62 N, 85.74 E  | <i>Geobacter</i><br><i>Sulfobolus</i> | 2.92E-02 | <i>Caldimicrobium</i><br><i>Desulfurella</i> | 1.48E-02 | <i>Thermodesulfobivrio</i><br><i>Desulfosporosinus</i>               | 3.82E-01 | SRR5313441   | 39   |

**Table S4. 16S rRNA gene amplicon sequencing-based metadata of global marine/terrestrial sites with presence of S<sup>0</sup>MMs (i.e., S<sup>0</sup>RM and S<sup>0</sup>DM) and SRMs. (Continued)**

| No | Type                      | Location        | Coordinates       | S <sup>0</sup> RB               |          | S <sup>0</sup> DB                  |          | SRB                                                              |          | Accession    | Ref. |
|----|---------------------------|-----------------|-------------------|---------------------------------|----------|------------------------------------|----------|------------------------------------------------------------------|----------|--------------|------|
|    |                           |                 |                   | Taxonomy                        | R.A. (%) | Taxonomy                           | R.A. (%) | Taxonomy                                                         | R.A. (%) |              |      |
| 55 | Hot spring sediment       | Tibet, China    | 31.61 N, 91.83 E  | <i>Geobacter Sulfolobus</i>     | 3.15E-02 | <i>Caldimicrobium Dethiobacter</i> | 8.27E-02 | <i>Thermodesulfobium Desulfobium Desulfobium</i>                 | 1.62E-01 | SRR5313461   | 39   |
| 56 | Hot spring sediment       | Tibet, China    | 28.25 N, 91.81 E  | <i>Geobacter Sulfolobus</i>     | 1.93E-01 | <i>Caldimicrobium Dethiobacter</i> | 3.63E-02 | <i>Desulfotomaculum Thermodesulfobium Desulfobium</i>            | 1.01E+00 | SRR5313524   | 39   |
| 57 | Hot spring sediment       | Yunnan, China   | 24.95 N, 98.44 E  | <i>Geobacter Sulfolobus</i>     | 7.76E-01 | <i>Caldimicrobium Desulfurella</i> | 5.65E-01 | <i>Thermodesulfobium Thermodesulfobium Desulfobium</i>           | 6.18E-01 | CRR144043    | 40   |
| 58 | Hot spring sediment       | Iceland         | 64.68N, 21.40W    | <i>Geobacter</i>                | 5.52E-03 | <i>Caldimicrobium Dethiobacter</i> | 2.79E-03 | <i>Desulfobulbus Desulfobium Thermodesulfobium</i>               | 1.58E-03 | SRR11066918  | 41   |
| 59 | Hot spring sediment       | Iceland         | 64.13N, 20.30 W   | <i>Geobacter</i>                | 1.59E-03 | <i>Caldimicrobium Dethiobacter</i> | 1.05E-02 | <i>Desulfobulbus Desulfobium Thermodesulfobium</i>               | 8.73E-03 | SRR11066925  | 41   |
| 60 | Hot spring sediment       | New Zealand     | 38.05 S, 176.36 E | <i>Geobacter</i>                | 3.36E-01 | <i>Desulfurella</i>                | 1.35E-02 | <i>Thermodesulfobium Thermodesulfobium</i>                       | 1.62E-01 | SRR129639161 | 42   |
| 61 | AMD <sup>d</sup> sediment | Shaoguan, China | 25.04 N, 113.66 E | <i>Geobacter Desulfuromonas</i> | 9.31E-03 | <i>Dethiobacter</i>                | 3.52E-02 | <i>Desulfomonile Desulfosporosinus Desulfotomaculum</i>          | 3.57E-01 | SRR8455939   | 43   |
| 62 | AMD sediment              | Guizhou, China  | 25.80N, 107.61E   | <i>Geobacter Desulfuromonas</i> | 2.85E+00 | <i>Desulfocapsa Dethiobacter</i>   | 1.28E-01 | <i>Desulfomonile Thermodesulfobium Desulfobium Desulfobulbus</i> | 3.92E+00 | SRR12726967  | 44   |
| 63 | AMD sediment              | Shaoguan, China | 24.55 N, 113.74 E | <i>Geobacter</i>                | 2.82E-03 | <i>Desulfocapsa</i>                | 2.04E-03 | <i>Desulfobulbus Desulfomonile Desulfosporosinus</i>             | 5.18E-01 | SRR12737887  | 44   |

**Table S4. 16S rRNA gene amplicon sequencing-based metadata of global marine/terrestrial sites with presence of S<sup>0</sup>MMs (i.e., S<sup>0</sup>RM and S<sup>0</sup>DM) and SRMs. (Continued)**

| No | Type         | Location                   | Coordinates       | S <sup>0</sup> RB               |          | S <sup>0</sup> DB                                     |          | SRB                                                                   |          | Accession    | Ref. |
|----|--------------|----------------------------|-------------------|---------------------------------|----------|-------------------------------------------------------|----------|-----------------------------------------------------------------------|----------|--------------|------|
|    |              |                            |                   | Taxonomy                        | R.A. (%) | Taxonomy                                              | R.A. (%) | Taxonomy                                                              | R.A. (%) |              |      |
| 64 | AMD sediment | Guangxi, China             | 25.14N, 107.50E   | <i>Geobacter</i>                | 4.60E-02 | <i>Dethiobacter Pantoea</i>                           | 1.07E-02 | <i>Desulfobulbus Desulfomonile Desulfosporosinus</i>                  | 9.42E-02 | SRR1274 4846 | 44   |
| 65 | AMD sediment | Shangrao, Jiangxi, China   | 29.00 N, 117.72 E | <i>Geobacter</i>                | 3.86E-03 | <i>Dethiobacter</i>                                   | 1.94E-03 | <i>Desulfosporosinus Desulfotomaculum</i>                             | 1.23E-02 | SRR1274 5062 | 44   |
| 66 | AMD sediment | Fankou, Guangdong, China   | 25.04 N, 113.66 E | <i>Geobacter</i>                | 1.42E-03 | N.A.                                                  | N.A.     | <i>Desulfobulbus Desulfomonile</i>                                    | 5.68E-02 | SRR1276 8936 | 44   |
| 67 | AMD sediment | Huangshaping, Hunan, China | 25.67N, 112.70E   | <i>Geobacter</i>                | 4.71E-03 | <i>Dethiobacter Pantoea</i>                           | 4.68E-03 | <i>Desulfotomaculum Desulfosporosinus</i>                             | 1.15E-02 | SRR1276 9161 | 44   |
| 68 | AMD sediment | Jiuan, Guizhou, China      | 26.52 N, 106.57 E | <i>Geobacter Desulfuromonas</i> | 3.87E-03 | <i>Dethiobacter Pantoea</i>                           | 3.97E-03 | <i>Desulfotomaculum Desulfosporosinus</i>                             | 8.43E-03 | SRR1276 9163 | 44   |
| 69 | AMD sediment | Longli, Guizhou, China     | 26.38 N, 106.97 E | <i>Geobacter</i>                | 2.00E-01 | <i>Desulfocapsa Pantoea</i>                           | 5.67E-03 | <i>Desulfobulbus Desulfobulbus</i>                                    | 8.92E-02 | SRR1276 9170 | 44   |
| 70 | AMD sediment | Longshenao, Guangxi, China | 24.83 N, 107.56 E | <i>Geobacter</i>                | 3.23E-02 | <i>Desulfocapsa</i>                                   | 8.32E-04 | <i>Desulfobulbus Desulfobulbus</i>                                    | 3.90E-02 | SRR1276 9176 | 44   |
| 71 | AMD sediment | Manshan, Anhui, China      | 31.67 N, 118.62 E | <i>Geobacter</i>                | 1.56E-02 | <i>Desulfocapsa</i>                                   | 9.94E-04 | <i>Desulfobulbus Desulfomonile Desulfosporosinus</i>                  | 2.62E-02 | SRR1280 8556 | 44   |
| 72 | AMD sediment | Shuikoushan, Hunan, China  | 26.53 N, 112.60 E | <i>Geobacter Desulfuromonas</i> | 7.31E-01 | <i>Desulfocapsa Desulfurella Dethiobacter Pantoea</i> | 5.08E-02 | <i>Desulfotomaculum Desulfobulbus Desulfomonile Desulfosporosinus</i> | 7.48E-01 | SRR1280 8561 | 44   |
| 73 | AMD sediment | Tongling, Anhui, China     | 30.94 N, 117.98 E | <i>Geobacter</i>                | 1.28E-02 | <i>Desulfocapsa</i>                                   | 4.66E-03 | <i>Desulfobulbus Desulfomonile Desulfosporosinus</i>                  | 2.23E-02 | SRR1280 8565 | 44   |
| 74 | AMD sediment | Wuhu, Anhui, China         | 31.08 N, 118.25 E | <i>Geobacter</i>                | 3.33E-03 | <i>Desulfocapsa</i>                                   | 1.12E-03 | <i>Desulfobulbus Desulfobulbus</i>                                    | 4.13E-02 | SRR1281 6447 | 44   |
| 75 | AMD sediment | Wuyi, Guangxi, China       | 25.14 N, 107.50 E | <i>Geobacter</i>                | 6.32E-01 | <i>Desulfocapsa Dethiobacter Pantoea</i>              | 4.01E-02 | <i>Desulfobulbus Desulfobulbus Desulfomonile</i>                      | 9.75E-01 | SRR1281 6452 | 44   |

**Table S4. 16S rRNA gene amplicon sequencing-based metadata of global marine/terrestrial sites with presence of S<sup>0</sup>MMs (i.e., S<sup>0</sup>RM and S<sup>0</sup>DM) and SRMs. (Continued)**

| No | Type                | Location                  | Coordinates       | S <sup>0</sup> RB               |          | S <sup>0</sup> DB           |          | SRB                                                                                                             |          | Accession   | Ref. |
|----|---------------------|---------------------------|-------------------|---------------------------------|----------|-----------------------------|----------|-----------------------------------------------------------------------------------------------------------------|----------|-------------|------|
|    |                     |                           |                   | Taxonomy                        | R.A. (%) | Taxonomy                    | R.A. (%) | Taxonomy                                                                                                        | R.A. (%) |             |      |
| 76 | AMD sediment        | Yunfu, Guangdong, China   | 22.96 N, 112.01E  | <i>Geobacter</i>                | 4.77E-03 | <i>Dethiobacter</i>         | 3.39E-03 | <i>Desulfotomaculum Desulfomonile Desulfosporosinus</i>                                                         | 1.24E-02 | SRR12816507 | 44   |
| 77 | AMD sediment        | Yongping, Jiangxi, China  | 28.19 N, 117.76 E | <i>Geobacter</i>                | 4.43E-03 | <i>Dethiobacter Pantoea</i> | 4.40E-03 | <i>Desulfotomaculum Desulfosporosinus</i>                                                                       | 9.87E-03 | SRR12816510 | 44   |
| 78 | AMD sediment        | Zhijin, Guizhou, China    | 26.60 N, 105.72 E | <i>Geobacter</i>                | 1.35E-02 | <i>Pantoea Desulfurella</i> | 4.94E-03 | <i>Desulfotomaculum Desulfosporosinus</i>                                                                       | 2.81E-02 | SRR12834021 | 44   |
| 79 | AMD sediment        | Yinshan, Jiangxi, China   | 28.97N, 117.60 E  | <i>Geobacter</i>                | 6.21E-03 | <i>Dethiobacter Pantoea</i> | 6.31E-03 | <i>Desulfotomaculum Desulfosporosinus</i>                                                                       | 1.83E-02 | SRR12834185 | 44   |
| 80 | AMD sediment        | Rio Tinto, Spain          | 37.59N, 6.55W     | <i>Geobacter</i>                | 1.87E-02 | N.A.                        | N.A.     | <i>Desulfobulbus Desulfosporosinus</i>                                                                          | 1.11E-02 | QFIRB012AB  | 45   |
| 81 | AMD sediment        | Rio Tinto, Spain          | 37.31N, 6.82W     | <i>Geobacter Desulfuromonas</i> | 3.51E+00 | N.A.                        | N.A.     | <i>Desulfotomaculum Desulfobulbus Desulfosporosinus Desulfobacterium Desulfosporosinus Desulfovibrio</i>        | 1.29E+01 | QFIRB010AC  | 45   |
| 82 | Freshwater sediment | Enshi, Hubei, China       | 31.04 N, 110.4 E  | <i>Geobacter Desulfuromonas</i> | 1.18E-01 | <i>Desulfocapsa</i>         | 1.06E-03 | <i>Desulfobulbus Desulfobacterium Desulfosporosinus Desulfovibrio</i>                                           | 1.78E-01 | SRR3944723  | 46   |
| 83 | Freshwater sediment | Changshou, Jiangsu, China | 31.77 N, 120.96 E | <i>Geobacter Desulfuromonas</i> | 1.05E-01 | <i>Desulfocapsa</i>         | 1.12E-03 | <i>Desulfobulbus Desulfomonile Desulfobulbus Desulfobacterium Desulfomonile Desulfosporosinus Desulfovibrio</i> | 1.09E-01 | SRR3944727  | 46   |
| 84 | Freshwater sediment | Yibing, Sichuan, China    | 28.8 N, 104.42 E  | <i>Geobacter Desulfuromonas</i> | 2.38E-01 | <i>Desulfocapsa</i>         | 1.27E-03 | <i>Desulfobulbus Desulfobacterium Desulfomonile Desulfosporosinus Desulfovibrio</i>                             | 2.45E-01 | SRR3944737  | 46   |
| 85 | Freshwater sediment | Guangan, Sichuan          | 30.35 N, 106.28 E | <i>Geobacter Desulfuromonas</i> | 3.97E-01 | <i>Desulfocapsa</i>         | 1.48E-03 | <i>Desulfobulbus Desulfobacterium Desulfomonile Desulfosporosinus Desulfovibrio</i>                             | 4.69E-01 | SRR3944744  | 46   |
| 86 | Freshwater sediment | Beipei, Chongqing         | 29.81 N, 106.46 E | <i>Geobacter Desulfuromonas</i> | 3.51E-01 | <i>Desulfocapsa</i>         | 1.06E-03 | <i>Desulfobulbus Desulfomonile Desulfobulbus Desulfobacterium Desulfomonile Desulfosporosinus Desulfovibrio</i> | 2.70E-01 | SRR3944753  | 46   |
| 87 | Freshwater sediment | Panzihua, Sichuan         | 26.57 N, 101.7 E  | <i>Geobacter Desulfuromonas</i> | 7.55E-01 | <i>Desulfocapsa</i>         | 2.75E-03 | <i>Desulfobulbus Desulfovibrio</i>                                                                              | 2.91E-01 | SRR3944771  | 46   |
| 88 | Freshwater sediment | Wushen, Chongqing         | 29.33 N, 107.76 E | <i>Geobacter Desulfuromonas</i> | 4.05E-01 | <i>Desulfocapsa</i>         | 3.35E-03 | <i>Desulfobulbus Desulfovibrio</i>                                                                              | 1.02E-01 | SRR3944777  | 46   |

**Table S4. 16S rRNA gene amplicon sequencing-based metadata of global marine/terrestrial sites with presence of S<sup>0</sup>MMs (i.e., S<sup>0</sup>RM and S<sup>0</sup>DM) and SRMs. (Continued)**

| No  | Type                       | Location                      | Coordinates       | S <sup>0</sup> RB                           |          | S <sup>0</sup> RB                    |          | SRB                                                                     |          | Accession   | Ref. |
|-----|----------------------------|-------------------------------|-------------------|---------------------------------------------|----------|--------------------------------------|----------|-------------------------------------------------------------------------|----------|-------------|------|
|     |                            |                               |                   | Taxonomy                                    | R.A. (%) | Taxonomy                             | R.A. (%) | Taxonomy                                                                | R.A. (%) |             |      |
| 89  | Freshwater sediment        | Zhengjiang, Jiangsu           | 32.18 N, 119.66 E | <i>Geobacter Desulfuro monas</i>            | 1.37E-01 | <i>Desulfocapsa Pantoea</i>          | 4.13E-01 | <i>Desulfobulbus Desulfomonile</i>                                      | 1.13E-01 | SRR3944998  | 46   |
| 90  | Freshwater sediment        | Yichang, Hubei                | 30.77 N, 111.31 E | <i>Geobacter Desulfuro monas</i>            | 9.66E-02 | <i>Desulfocapsa</i>                  | 4.90E-03 | <i>Desulfobacterium Desulfomonile Desulfobacterium Desulfobulbus</i>    | 3.00E-01 | SRR3944785  | 46   |
| 91  | Freshwater sediment        | Dongtinghu, Hunan             | 29.42 N, 113.13 E | <i>Geobacter Desulfuro monas</i>            | 2.72E-01 | <i>Pantoea</i>                       | 7.06E-03 | <i>Desulfomonile Desulfobacterium Desulfobulbus</i>                     | 1.46E-01 | SRR3944798  | 46   |
| 92  | Freshwater sediment        | Yiyang, Hunan                 | 29.07 N, 112.29 E | <i>Geobacter Desulfuro monas</i>            | 1.33E-01 | <i>Desulfocapsa</i>                  | 8.85E-03 | <i>Desulfomonile Desulfosporosinus Desulfobulbus</i>                    | 3.40E-01 | SRR3944806  | 46   |
| 93  | Freshwater sediment        | Changde, Hunan                | 28.91 N, 112.06 E | <i>Geobacter Desulfuro monas</i>            | 1.71E-01 | <i>Desulfocapsa</i>                  | 1.11E-02 | <i>Desulfomonile Desulfosporosinus</i>                                  | 2.10E-01 | SRR3944815  | 46   |
| 94  | Hydrothermal vent sediment | Atlantic Ocean                | 37.84 N, 31.51 W  | <i>Hippea Desulfuro monas</i>               | 7.81E-02 | <i>Desulfocapsa</i>                  | 2.50E-02 | <i>Desulfovibrio Desulfobulbus</i>                                      | 7.43E-02 | ERR10783031 | 47   |
| 95  | Hydrothermal vent sediment | Atlantic Ocean                | 37.81 N, 31.58 W  | <i>Geobacter</i>                            | 1.75E-02 | <i>Dissulfuribacter</i>              | 8.62E-02 | <i>Desulfobulbus</i>                                                    | 1.75E-02 | ERR9954321  | 47   |
| 96  | Hydrothermal vent sediment | Pacific Ocean, Dorado Outcrop | 9.08 N, 87.10 W   | <i>Geobacter Desulfuro monas Pelobacter</i> | 8.47E-02 | <i>Dethiobacter</i>                  | 4.69E-05 | <i>Desulfovibrio Desulfobulbus Desulfobacter Thermodesulfobacterium</i> | 8.65E-02 | SRR6715662  | 48   |
| 97  | Hydrothermal vent sediment | Guayman Basin, Mexico         | 27.26 N, 111.50 W | <i>Geobacter Desulfuro monas</i>            | 1.32E-01 | <i>Desulfocapsa</i>                  | 5.34E-03 | <i>Desulfobacterium Desulfobulbus</i>                                   | 1.15E+00 | SRR11568399 | 49   |
| 98  | Hydrothermal vent sediment | Guayman Basin, Mexico         | 27.35 N, 111.28 W | <i>Geobacter Desulfuro monas</i>            | 7.40E-02 | <i>Desulfocapsa</i>                  | 5.23E-01 | <i>Desulfococcus Desulfosarcina Desulfobulbus</i>                       | 3.20E+00 | SRR19201761 | 50   |
| 99  | Hydrothermal vent sediment | Pacific Ocean                 | 20.05 S, 176.13 W | <i>Hippea</i>                               | 1.35E-01 | <i>Desulfocapsa</i>                  | 4.58E-02 | <i>Desulfobulbus Thermodesulfator</i>                                   | 1.26E+01 | SRR027260   | 51   |
| 100 | Hydrothermal vent sediment | Atlantic Ocean                | 38.23 N, 26.63 W  | <i>Desulfuro monas</i>                      | 2.93E-02 | <i>Desulfocapsa Dissulfuribacter</i> | 1.04E-01 | <i>Desulfobacter</i>                                                    | 1.17E02  | SRR027592   | 51   |

Note: a, major genera of S<sup>0</sup>RM, S<sup>0</sup>DM, and SRMs were provided based on the taxonomy information of each sample. The following SRMs were included to calculate the relative abundance of SRMs: *Desulfotomaculum*, *Desulfovibrio*, *Desulfobulbus*, *Desulfobacter*, *Desulfobacterium*, *Desulfococcus*, *Desulfosarcina*, *Thermodesulfobacterium*, *Thermodesulfobacterium*, *Archaeoglobus*, *Thermodesulfator*, *Desulfosporomusa*, *Desulfohalobium*, *Desulfocaldus*, *Desulfomicrobium*, *Desulfonatronovibrio*, *Desulfonatronum*, *Desulfomonile*, *Desulfarculus*, *Desulfosporosinus*, *Thermodesulfobium*, *Thermocladium*. See Table S2 for the list of S<sup>0</sup>RM and S<sup>0</sup>DM.

b, relative abundance (R.A.) of S<sup>0</sup>RM, S<sup>0</sup>DM, and SRMs were calculated by using following equation: Relative abundance (%) =  $I_{si} / \sum N_{si} \times 100$ , where  $I_{si}$  was the total sequencing reads of S<sup>0</sup>RM, S<sup>0</sup>DM, and SRMs, and  $\sum N_{si}$  was the total sequencing reads of the sample.

c, sequencing data for sample 8-11 were provided on the following website: <https://figshare.com/s/82a2d3f5d38ace925492>

d, Acid mine drainage

**Table S5. Metagenome sequencing-based metadata of global marine/terrestrial sites with the presence of both S<sup>0</sup>RM and SRMs.**

| No | Type            | Location       | Coordinates       | <i>psrA/dsrC</i> <sup>a</sup> | Accession   | Reference |
|----|-----------------|----------------|-------------------|-------------------------------|-------------|-----------|
| 1  | Marine sediment | Atlantic Ocean | 30.34S, 7.81W     | 1.63E-03                      | ERR3363723  | 52        |
| 2  | Marine sediment | Atlantic Ocean | 34.79S, 18.96W    | 1.17E-02                      | ERR3363725  | 52        |
| 3  | Marine sediment | Atlantic Ocean | 32.53S, 13.55W    | 1.81E-03                      | ERR3363726  | 52        |
| 4  | Marine sediment | Pacific Ocean  | 39.8S, 139.8W     | 3.94E-03                      | SRR2605792  | 53        |
| 5  | Marine sediment | Pacific Ocean  | 39.8S, 139.8W     | 4.14E-03                      | SRR2605793  | 53        |
| 6  | Marine sediment | Pacific Ocean  | 66.4S, 140.5W     | 1.59E-03                      | SRR5486138  | 54        |
| 7  | Marine sediment | Pacific Ocean  | 66.4S, 140.5W     | 1.70E-03                      | SRR5486139  | 54        |
| 8  | Marine sediment | Ross Sea       | 75.20 S, 176.59 W | 1.71E-03                      | SRR10156264 | 55        |
| 9  | Marine sediment | Ross Sea       | 72.46 S, 104.36 W | 3.41E-03                      | SRR10156265 | 55        |
| 10 | Marine sediment | Pacific Ocean  | 71.45 S, 102.16 W | 2.07E-03                      | SRR10156269 | 55        |
| 11 | Marine sediment | Pacific Ocean  | 70.48 S, 95.20 W  | 2.84E-03                      | SRR10156270 | 55        |
| 12 | Marine sediment | Ross Sea       | 75.50 S, 166.30 W | 3.13E-03                      | SRR10156272 | 55        |
| 13 | Marine sediment | Philippine Sea | 9.86 N, 138.66 E  | 1.50E-03                      | SRR7467837  | 56        |
| 14 | Marine sediment | Philippine Sea | 9.65 N, 138.82 E  | 1.69E-03                      | SRR7467840  | 56        |

a, the ratio of *psrA/dsrC* represent the ratio between S<sup>0</sup>RM and SRMs, where the reads of *psrA* and *dsrC* was employed to represent abundance of S<sup>0</sup>RM and SRMs, respectively. *psrA*: polysulfide reductase subunit A; *dsrC*: dissimilatory sulfite reductase subunit C.

**Table S6. Primers for qPCR amplification of target genes.**

| <b>Target gene or primer name</b> | <b>Forward primer</b>         | <b>Reverse primer</b>         | <b>Length</b> | <b>Reference</b> |
|-----------------------------------|-------------------------------|-------------------------------|---------------|------------------|
| <i>recA</i>                       | GCCCTGTTTCGACATCCTCT<br>A     | GGAGTCATGCCAAGGTGT<br>TC      | 222           | 57               |
| <i>dsrC</i>                       | GCTGAAGTCACTTACAAGG<br>GC     | CCGGTGTTCTTCGAGAGG<br>AT      | 218           | 58               |
| Geo196F/5<br>35R                  | GAATATGCTCCTGATTC             | TAAATCCGAACAACGCTT            | 340           | 59               |
| DSV691F/8<br>26R                  | CCGTAGATATCTGGAGGA<br>ACATCAG | ACATCTAGCATCCATCGTT<br>TACAGC | 136           | 60               |
| <i>sqr</i>                        | ACGACTACGACTGGCTTGT<br>G      | GCAGCATCTTCTTGCGAA<br>GG      | 141           | This study       |

## SI References

1. N. Pfennig, H. Biebl, *Desulfuromonas acetoxidans* gen. nov. and sp. nov., a new anaerobic, sulfur-reducing, acetate-oxidizing bacterium. *Arch. Microbiol.* 110, 3–12 (1976).
2. K. Finster, F. Bak, N. Pfennig, *Desulfuromonas acetexigens* sp. nov., a dissimilatory sulfur-reducing eubacterium from anoxic freshwater sediments. *Arch. Microbiol.* 161, 328–332 (1994).
3. M.L. Miroshnichenko, F.A. Rainey, M. Rhode, E.A. Bonch-Osmolovskaya, *Hippea maritima* gen. nov., sp. nov., a new genus of thermophilic, sulfur-reducing bacterium from submarine hot vents. *Inter. J. Syst. Bacteriol.* 49, 1033–1038 (1999).
4. F. Caccavo, D.J. Lonergan, D.R. Lovley, M. Davis, J.F. Stolz, M.J. McInerney, *Geobacter sulfurreducens* sp. nov., a hydrogen- and acetate-oxidizing dissimilatory metal-reducing microorganism. *Appl. Environ. Microbiol.* 60, 3752–3759 (1994).
5. D.R. Lovley, E.J. Phillips, D.J. Lonergan, P.K. Widman, Fe(III) and S<sup>0</sup> reduction by *Pelobacter carbinolicus*. *Appl. Environ. Microbiol.* 61, 2132–2138 (1995).
6. E.A. Bonch-Osmolovskaya, T.G. Sokolova, N.A. Kostrikina, G.A. Zavarzin, *Desulfurella acetivorans* gen. nov. and sp. nov.—a new thermophilic sulfur-reducing eubacterium. *Arch. Microbiol.* 153, 151–155 (1990).
7. A. Seegerer, A. Neuner, J.K. Kristjansson, K.O. Stetter, *Acidianus infernus* gen. nov., sp. nov., and *Acidianus brierleyi* comb. nov.: facultatively aerobic, extremely acidophilic thermophilic sulfur-metabolizing archaeobacteria. *Inter. J. Syst. Bacteriol.* 36, 559–564 (1986).
8. W. Zillig, S. Yeats, I. Holz, A. Bock, F. Gropp, M. Rettenberger, S. Lutz, Plasmid-related anaerobic autotrophy of the novel archaeobacterium *Sulfolobus ambivalens*. *Nature* 313, 789–791 (1985).
9. F. Fischer, W. Zillig, K.O. Stetter, G. Schreiber, Chemolithoautotrophic metabolism of anaerobic extremely thermophilic archaeobacteria. *Nature* 301, 511–513 (1983).
10. A.H. Seegerer, A. Trincone, M. Gahrtz, K.O. Stetter, *Stygiolobus azoricus* gen. nov., sp. nov. represents a novel genus of anaerobic, extremely thermoacidophilic archaeobacteria of the order Sulfolobales. *Inter. J. Syst. Bacteriol.* 41, 495–501 (1991).
11. S. Yvenou, M. Allieux, A. Slobodkin, G. Slobodkina, M. Jebbar, K. Alain, Genetic potential of *Dissulfurimicrobium hydrothermale*, an obligate sulfur-disproportionating thermophilic microorganism. *Microorganisms* 10, 60 (2022).
12. K. Umezawa, H. Kojima, Y. Kato, M. Fukui, *Dissulfurispira thermophila* gen. nov., sp. nov., a thermophilic chemolithoautotroph growing by sulfur disproportionation, and proposal of novel taxa in the phylum Nitrospirota to reclassify the genus *Thermodesulfovibrio*. *Syst. Appl. Microbiol.* 44, 126184 (2021).
13. M. Allieux, S. Yvenou, G. Slobodkina, A. Slobodkin, Z. Shao, M. Jebbar, K. Alain, Genomic characterization and environmental distribution of a thermophilic Anaerobe *Dissulfurirhabdus thermomarina* SH388T involved in disproportionation of sulfur compounds in shallow sea hydrothermal vents. *Microorganisms* 8, 1132 (2020).
14. T.V. Kolganova, N.A. Kostrikina, E.A. Bonch-Osmolovskaya, 2013. *Dissulfuribacter thermophilus* gen. nov., sp. nov. a novel thermophilic autotrophic sulfur-disproportionating deeply-branching delta-proteobacterium from a deep-sea hydrothermal vent of the Eastern Lau Spreading Center. *Int. J. Syst. Evol. Microbiol.* 63, 1967–1971 (2013).
15. H. Kojima, K. Umezawa, M. Fukui, *Caldimicrobium thiodismutans* sp. nov., a sulfur-disproportionating bacterium isolated from a hot spring, and emended description of the genus *Caldimicrobium*. *Int. J. Syst. Evol. Microbiol.* 66, 1828–1831 (2016).
16. T.M. Frederiksen, K. Finster, Sulfite-oxido-reductase is involved in the oxidation of sulfite in *Desulfocapsa sulfoexigens* during disproportionation of thiosulfate and elemental sulfur. *Biodegradation* 14, 189–98 (2003).
17. A.P. Florentino, C. Brienza, A.J.M. Stams, I. Sánchez-Andrea, *Desulfurella amilsii* sp. nov., a novel acidotolerant sulfur-respiring bacterium isolated from acidic river sediments. *Int. J. Syst. Evol. Microbiol.* 66, 1249–1253 (2016).
18. D.Y. Sorokin, T.P. Tourova, M. Mußmann, G. Muyzer, *Dethiobacter alkaliphilus* gen. nov. sp. nov., and *Desulfurivibrio alkaliphilus* gen. nov. sp. nov.: two novel representatives of reductive sulfur cycle from soda lakes. *Extremophiles* 12, 431–439 (2008).



19. A.Y. Obraztsova, C.A. Francis, M.T. Bradley, Sulfur disproportionation by the facultative anaerobe *Pantoea agglomerans* SP1 as a mechanism for chromium(VI) reduction. *Geomicrobiol. J.* 19, 121–132 (2002).
20. A.I. Slobodkin, A.L. Reysenbach, G.B. Slobodkina, R.V. Baslerov, N.A. Kostrikina, I.D. Wagner, E.A. Bonch-Osmolovskaya, *Thermosulfurimonas dismutans* gen. nov., sp. nov. a novel extremely thermophilic sulfur disproportionating bacterium from a deep-sea hydrothermal vent. *Int. J. Syst. Evol. Microbiol.* 62, 2565–2571 (2012).
21. G.B. Slobodkina, A. Reysenbach, T.V. Kolganova, A.A. Novikov, E.A. Bonch-Osmolovskaya, A.I. Slobodkin. *Thermosulfuriphilus ammonigenes* gen. nov., sp. nov., a thermophilic, chemolithoautotrophic bacterium capable of respiratory ammonification of nitrate with elemental sulfur. *Int. J. Syst. Evol. Microbiol.* 67, 3474–3479 (2017).
22. M. Ji, W. Kong, H. Jia, M. Delgado-Baquerizo, T. Zhou, X. Liu, B.C. Ferrari, L. Malard, C. Liang, K. Xue, T.P. Makhallanyane, Y. Zhu, Y. Wang, D.A. Pearce, D. Cowan, Polar soils exhibit distinct patterns in microbial diversity and dominant phylotypes. *Soil Biol. Biochem.* 11, 108550 (2022).
23. M. Delgado-Baquerizo, A.M. Oliverio, T.E. Brewer, A. Benavent-Gonzalez, D.J. Eldridge, R.D. Bardgett, F.T. Maestre, B.K. Singh, N. Fierer, A global atlas of the dominant bacteria found in soil. *Science* 359, 320–325 (2018).
24. A. Khan, W. Kong, M. Ji, L. Yue, Y. Xie, J. Liu, B. Xu, Disparity in soil bacterial community succession along a short time-scale deglaciation chronosequence on the Tibetan Plateau. *Soil Ecol. Lett.* 2, 83-92 (2020).
25. M. Ji, W. Kong, C. Liang, T. Zhou, H. Jia, X. Dong, Permafrost thawing exhibits a greater influence on bacterial richness and community structure than permafrost age in arctic permafrost soils. *Cryosphere* 14, 3907-3916 (2020).
26. D. Probandt, K. Knittel, H.E. Tegetmeyer, S. Ahmerkamp, M. Holtappels, R. Amann, Permeability shapes bacterial communities in sublittoral surface sediments. *Environ. Microbiol.* 19, 1584–1599 (2017).
27. N. Mahmoudi, M.S. Robeson 2<sup>nd</sup>, H.F. Castro, J.L. Fortney, S.M. Techtmann, D.C. Joyner, C.J. Paradis, S.M. Pfiffner, T.C. Hazen, Microbial community composition and diversity in Caspian Sea sediments. *FEMS Microbiol. Ecol.* 91, 1–11 (2015).
28. J. Buongiorno, L.C. Herbert, L.M. Wehrmann, A.B. Michaud, K. Laufer, H. Roy, B.B. Jorgensen, A. Szykiewicz, A. Faiia, K.M. Yeager, K. Schindler, K.G. Lloyd, Complex microbial communities drive iron and sulfur cycling in Arctic Fjord sediments. *Appl. Environ. Microbiol.* 85, e00949-19 (2019).
29. S.E. Ruff, J.F. Biddle, A.P. Teske, K. Knittel, A. Boetius, A. Ramette, Global dispersion and local diversification of the methane seep microbiome. *Proc. Nat. Acad. Sci. USA* 112, 4015–4020 (2015).
30. G. Varliero, C. Bienhold, F. Schmid, A. Boetius, M. Molari, Microbial diversity and connectivity in deep-sea sediments of the South Atlantic Polar Front. *Front. Microbiol.* 10, 665 (2019).
31. R.A. Walsh, J.B. Kirkpatrick, R. Pockalny, J. Sauvage, A.J. Spivack, R.W. Murray, M.L. Sogin, S. D'Hondt, Relationship of bacterial richness to organic degradation rate and sediment age in subseafloor sediment. *Appl. Environ. Microbiol.* 82, 4994–4999 (2016).
32. E.K. Wear, M.J. Church, B.N. Oreutt, C.N. Shulze, M.V. Lindh, C.R. Smith, Bacterial and archaeal communities in polymetallic nodules, sediments, and bottom waters of the Abyssal Clarion-Clipperton Zone: Emerging patterns and future monitoring considerations. *Front. Marine Sci.* 8, 480 (2021).
33. X. Fang, T. Zhang, J. Li, N. Wang, Z. Wang, L. Yu, Bacterial community pattern along the sediment seafloor of the Arctic fjorden (Kongsfjorden, Svalbard). *Antonie van Leeuwenhoek* 112, 1121–1136 (2019).
34. Z. Kerrigan, J.B. Kirkpatrick, S. D'Hondt, Influence of 16S rRNA hypervariable region on estimates of bacterial diversity and community composition in seawater and marine sediment. *Front. Microbiol.* 10, 1640 (2019).
35. L.Wang, M. Yu, Y. Liu, J. Liu, Y. Wu, L. Li, J. Liu, M. Wang, X. Zhang, Comparative analyses of the bacterial community of hydrothermal deposits and seafloor sediments across Okinawa Trough. *J. Marine Syst.* 180, 162-72 (2018).

36. R.K. Sinha, K.P. Krishnan, F.A. Thomas, M.B. Binish, M. Mohan, P.J. Kurian, Polyphasic approach revealed complex bacterial community structure and function in deep sea sediment of ultra-slow spreading Southwest Indian Ridge. *Ecol. Indi.* 96, 40-51 (2019).
37. B. Zhang, Y. Li, S. Xiang, Y. Yan, R. Yang, M. Lin, X. Wang, Y. Xue, X. Guan, Sediment microbial communities and their potential role as environmental pollution indicators in Xuande Atoll, South China Sea. *Front. Microbiol.* 11, 1011 (2020).
38. T. Hoshino, H. Doi, G. Uramoto, L. Wormer, R.R. Adhikari, N. Xiao, Y. Morono, S. D'Hondt, K. Hinrichs, F. Inagaki, Global diversity of microbial communities in marine sediment. *Proc. Nat. Acad. Sci. USA* 117, 27587–27597 (2020).
39. Y. Zhang, G. Wu, H. Jiang, J. Yang, W. She, I. Khan, W. Li, Abundant and rare microbial biospheres respond differently to environmental and spatial factors in Tibetan Hot Springs. *Front. Microbiol.* 9, 2096 (2018).
40. Q. He, S. Wang, W. Hou, K. Feng, F. Li, W. Hai, Y. Zhang, Y. Sun, Y. Deng, Temperature and microbial interactions drive the deterministic assembly processes in sediments of hot springs. *Sci. Total Environ.* 772, 145465 (2021).
41. P.T. Podar, Z. Yang, S.H. Björnsdóttir, M. Podar, Comparative analysis of microbial diversity across temperature gradients in Hot Springs from Yellowstone and Iceland. *Front. Microbiol.* 11, 1625 (2020).
42. C. Sriaporn, K.A. Campbell, M.J. Van Kranendonk, K.M. Handley, Genomic adaptations enabling *Acidithiobacillus* distribution across wide-ranging hot spring temperatures and pHs. *Microbiome* 9, 135 (2021).
43. S.M. Gao, A. Schippers, N. Chen, Y. Yuan, M. Zhang, Q. Li, B. Liao, W. Shu, L. Huang, Depth-related variability in viral communities in highly stratified sulfidic mine tailings. *Microbiome* 8, 89 (2020).
44. Y. Hao, X. Zhao, H. Ai, S. Gao, W. Teng, J. Zheng, W. Shu, Microbial biogeography of acid mine drainage sediments at a regional scale across southern China. *FEMS Microbiol. Ecol.* 98, fiac002 (2022).
45. S.M. Abramov, D. Straub, J. Tejada, L. Grimm, F. Schadler, A. Bulaev, H. Thorwarth, R. Amils, A. Kappler, S. Kleindienst, Biogeochemical niches of Fe-cycling communities influencing heavy metal transport along the Rio Tinto, Spain. *Appl. Environ. Microbiol.* 88, e0229021 (2022).
46. T. Liu, A.N. Zhang, J. Wang, S. Liu, X. Jiang, C. Dang, T. Ma, S. Liu, Q. Chen, S. Xie, T. Zhang, J. Ni, Integrated biogeography of planktonic and sedimentary bacterial communities in the Yangtze River. *Microbiome* 6, 16 (2018).
47. D.V. Meier, W. Bach, P.R. Girguis, H.R. Gruber-Vodicka, E.P. Reeves, M. Richter, C. Vidoudez, R. Amann, A. Meyerdierks, Heterotrophic Proteobacteria in the vicinity of diffuse hydrothermal venting. *Environ. Microbiol.* 18, 4348–4368 (2016).
48. L.A. Zinke, B.K. Reese, J. McManus, C.G. Wheat, B.N. Orcutt, J.P. Amend, Sediment microbial communities influenced by cool hydrothermal fluid migration. *Front. Microbiol.* 9, 1249 (2018).
49. A. Teske, G. Wegener, J.P. Chanton, D. White, B. MacGregor, D. Hoer, D. de Beer, G. Zhuang, M.A. Saxton, S.B. Joye, D. Lizarralde, S.A. Soule, S.E. Ruff, Microbial communities under distinct thermal and geochemical regimes in axial and off-axis sediments of Guaymas Basin. *Front. Microbiol.* 12, 633649 (2021).
50. P. Cruaud, V. Adrien, P. Patricia, C. Jean-Claude, L. Françoise, T. Laurent, G. Anne, C. Marie-Anne, Microbial communities associated with benthic faunal assemblages at cold seep sediments of the Sonora Margin, Guaymas Basin. *Front. Marine Sci.* 2, 53 (2015).
51. S.E. Ruff, J.F. Biddle, A.P. Teske, K. Nittel, A. Boetius, A. Ramette, Global dispersion and local diversification of the methane seep microbiome. *Proc. Nat. Acad. Sci. USA* 112, 4015–4020 (2015).
52. F.H. Coutinho, F.A.B. von Meijenfheldt, J.M. Walter, J.M. Haro-Moreno, M. López-Pérez, M.C. van Verk, C.C. Thompson, C.A.N. Cosenza, L. Appolinario, R. Paranhos, A. Cabral, B.E. Dutilh, F.L. Thompson. Ecogenomics and metabolic potential of the South Atlantic Ocean microbiome. *Sci. Total Environ.* 765, 142758 (2021).
53. B.J. Tully, J.F. Heidelberg, Potential mechanisms for microbial energy acquisition in oxic deep-sea sediments. *Appl. Environ. Microbiol.* 82, 4232–4243 (2016).

54. S.A. Carr, F. Schubotz, R.B. Dunbar, C.T. Mills, R. Dias, R.E. Summons, K.W. Mandernack, Acetoclastic *Methanosaeta* are dominant methanogens in organic-rich Antarctic marine sediments. *ISME J.* 12, 330–342 (2018).
55. A.I. Garber, J.R. Zehnpfennig, C.S. Sheik, M.W. Henson, G.A. Ramírez, A.R. Mahon, K.M. Halanych, D.R. Learman, Metagenomics of antarctic marine sediment reveals potential for diverse chemolithoautotrophy. *mSphere* 6, e0077021 (2021).
56. X. Zhang, W. Xu, Y. Liu, M. Cai, Z. Luo, M. Li, Metagenomics reveals microbial diversity and metabolic potentials of seawater and surface sediment from a hadal biosphere at the Yap Trench. *Front. Microbiol.* 9, 2402 (2018).
57. K. Sivakumar, G. Scarascia, N. Zaouri, T. Wang, A.H. Kaksonen, P. Hong, Salinity-mediated increment in sulfate reduction, biofilm formation, and quorum sensing: a potential connection between quorum sensing and sulfate reduction? *Front. Microbiol.* 10, 188 (2019).
58. M. Clark, R. Edelman, M.L. Duley, J. Wall, M. Fields, Biofilm formation in *Desulfovibrio vulgaris* Hildenborough is dependent upon protein filaments. *Environ. Microbiol.* 9, 2844–2854 (2007).
59. B.K. Amos, Y. Sung, K.E. Fletcher, T.J. Gentry, W. Wu, C.S. Criddle, J. Zhou, F.E. Löffler, Detection and quantification of *Geobacter lovleyi* strain SZ: implications for bioremediation at tetrachloroethene- and uranium-impacted sites. *Appl. Environ. Microbiol.* 73, 6898-904 (2007).
60. A. Fite, G.T. Macfarlane, J.H. Cummings, Identification and quantitation of mucosal and faecal *Desulfovibrio* using real time polymerase chain reaction. *Gut* 53, 523-529 (2004).
